# Supplementary material
Source: PubMed Central journal article supplement (PMC7558039)
Supplement: ao0c04228_si_001.pdf [file ao0c04228_si_001.pdf]

# Supporting Information

## One-pot Parallel Synthesis of Unclosed Cryptands – Searching for Selective Anion Receptors *via* Static Combinatorial Chemistry Techniques

Patryk Niedbała and Janusz Jurczak\*

Institute of Organic Chemistry, Polish Academy of Sciences, Kasprzaka 44/52, 01-224 Warsaw, Poland.

E-mail: jurczak\_group@icho.edu.pl

### **Contents**

|      |                                                        |    |
|------|--------------------------------------------------------|----|
| 1.   | SYNTHETIC PROCEDURES AND STRUCTURAL ANALYSIS           | 2  |
| 1.1. | General Remarks                                        | 2  |
| 1.2. | Substance Analysis                                     | 2  |
| 1.3. | Conversions observed in combinatorial experiments      | 7  |
| 2.   | COPIES OF $^1\text{H}$ AND $^{13}\text{C}$ NMR SPECTRA | 8  |
| 3.   | TITRATION EXPERIMENTS                                  | 21 |
| 4.   | REFERENCES                                             | 24 |

# 1. Synthetic Procedures and Structural Analysis

## 1.1. General Remarks

All solvents were of reagent grade quality. All reagents were purchased from Sigma-Aldrich and TCI Chemicals and used without further purification. Column chromatography was carried out using Merck Kieselgel 60 (63–100  $\mu\text{m}$  mesh size), TLC was carried out on Merck Kieselgel F254 plates. Melting points were determined using a Boëtius M HMK hot-stage apparatus and were uncorrected. The NMR spectra were recorded on a Bruker Mercury 400 instrument. Chemical shifts are reported in ppm and are set to solvent residue peak. The splitting pattern of multiplets is described by abbreviations (s – singlet, d – doublet, t – triplet, q – quartet, dd – doublet of doublets, m – multiplet, c – covered signal, b – broad peak).  $J$  coupling constants values are reported in Hz. Mass spectral analyses were performed with the ESI-TOF technique on a Mariner mass spectrometer from PerSeptive Biosystem.

## 1.2. Substance Analysis

### *tert*-Butyl *N*-{4,11,17,24-Tetraoxo-2,26-dioxa-5,10,18,23,32-pentaazatricyclo[25.3.1.1<sup>12,16</sup>]dotriaconta-1(31),12,14,16-(32),27,29-hexaen-31-yl}carbamate (**1**)

The product **1** was obtained as previously described.<sup>1</sup>

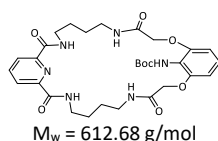

|                                                             |                                                                                                                                                                                                                                                                                                                            |
|-------------------------------------------------------------|----------------------------------------------------------------------------------------------------------------------------------------------------------------------------------------------------------------------------------------------------------------------------------------------------------------------------|
| <sup>1</sup> H NMR (400 MHz, DMSO- <i>d</i> <sub>6</sub> )  | $\delta$ 9.34 (t, $J = 5.5$ Hz, 2H), 8.70 (s, 1H), 8.19 – 8.10 (m, $J = 8.9, 2.7$ Hz, 3H), 8.07 (t, $J = 4.7$ Hz, 2H), 7.11 (t, $J = 8.4$ Hz, 1H), 6.64 (d, $J = 8.5$ Hz, 2H), 4.54 (s, 4H), 3.30 – 3.25 (m, 4H), 3.20 (dd, $J = 11.6, 5.8$ Hz, 4H), 1.61 (dd, $J = 14.6, 8.2$ Hz, 4H), 1.56 – 1.46 (m, 4H), 1.16 (s, 9H). |
| <sup>13</sup> C NMR (100 MHz, DMSO- <i>d</i> <sub>6</sub> ) | $\delta$ 167.4, 162.9, 154.1, 152.5, 148.7, 139.1, 126.6, 123.9, 115.1, 105.0, 78.9, 66.7, 38.1, 27.9, 26.7, 26.2.                                                                                                                                                                                                         |

### 31-amino-2,26-dioxa-5,10,18,23,32-pentaazatricyclo[25.3.1.1<sup>12,16</sup>]dotriaconta-1(31),12,14,16(32),27,29-hexaene-4,11,17,24-tetrone (**2**)

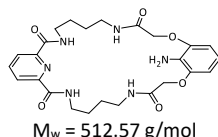

|                                                             |                                                                                                                                                                                           |
|-------------------------------------------------------------|-------------------------------------------------------------------------------------------------------------------------------------------------------------------------------------------|
| <sup>1</sup> H NMR (400 MHz, DMSO- <i>d</i> <sub>6</sub> )  | $\delta$ 9.46 (bs, 2H), 8.33 (bs, 2H), 8.19-8.15 (m, 3H), 6.59 (d, $J = 7.8$ , 2H), 6.48 (t, $J = 8.1$ Hz, 1H), 5.22 (bs, 2H), 4.43 (s, 4H), 3.26 (bs, 8H), 1.60 (bs, 4H), 1.51 (bs, 4H). |
| <sup>13</sup> C NMR (100 MHz, DMSO- <i>d</i> <sub>6</sub> ) | $\delta$ 167.5, 162.9, 148.8, 145.1, 139.3, 124.2, 114.9, 106.9, 68.2, 39.0, 37.9, 30.6, 27.7, 27.3.                                                                                      |
| HRMS ESI (m/z)                                              | Calcd for C <sub>25</sub> H <sub>32</sub> N <sub>6</sub> O <sub>6</sub> Na [M + Na] <sup>+</sup> : 535.2281; found: 535.2277.                                                             |

### *N*-{4,11,17,24-tetraoxo-2,26-dioxa-5,10,18,23,32-pentaazatricyclo[25.3.1.1<sup>12,16</sup>]dotriaconta-1(31),12,14,16(32),27,29-hexaen-31-yl}acetamide (**3**)

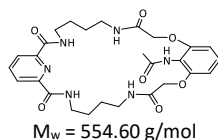

|                                                             |                                                                                                                                                                                                                                                                                                                |
|-------------------------------------------------------------|----------------------------------------------------------------------------------------------------------------------------------------------------------------------------------------------------------------------------------------------------------------------------------------------------------------|
| <sup>1</sup> H NMR (400 MHz, DMSO- <i>d</i> <sub>6</sub> )  | $\delta$ 9.52 (s, 1H), 9.37 (t, $J = 6.0$ Hz, 2H), 8.25 (t, $J = 5.3$ Hz, 2H), 8.22 – 8.10 (m, 3H), 7.15 (t, $J = 8.4$ Hz, 1H), 6.69 (d, $J = 8.5$ Hz, 2H), 4.51 (s, 4H), 3.30 (d, $J = 7.0$ Hz, 4H), 3.21 (dd, $J = 10.9, 5.3$ Hz, 4H), 1.95 (s, 3H), 1.68 (d, $J = 6.2$ Hz, 4H), 1.52 (d, $J = 3.9$ Hz, 4H). |
| <sup>13</sup> C NMR (100 MHz, DMSO- <i>d</i> <sub>6</sub> ) | $\delta$ 169.0, 167.2, 163.0, 152.3, 148.9, 139.2, 127.1, 124.0, 114.8, 105.3, 66.9, 39.0, 37.9, 26.8, 26.3, 22.6.                                                                                                                                                                                             |

***N*-{4,11,17,24-tetraoxo-2,26-dioxa-5,10,18,23,32-pentaazatricyclo[25.3.1.1<sup>12</sup>,16]dotriaconta-1(31),12,14,16(32),27,29-hexaen-31-yl}propanamide (4)**

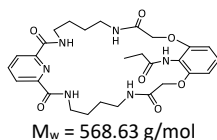

Following General Procedure **A** and using propionyl chloride (24  $\mu\text{L}$ , 0.28 mmol) the product **4** (0.122 g, 0.21 mmol, **93%**) was obtained as a colorless solid (mp 261-262  $^\circ\text{C}$ )

**<sup>1</sup>H NMR** (400 MHz, DMSO-*d*<sub>6</sub>)

$\delta$  9.42 (s, 1H), 9.36 (t,  $J = 5.1 \text{ Hz}$ , 2H), 8.35 (t,  $J = 4.9 \text{ Hz}$ , 2H), 8.20 – 8.10 (m, 3H), 7.15 (t,  $J = 8.3 \text{ Hz}$ , 1H), 6.67 (d,  $J = 8.4 \text{ Hz}$ , 2H), 4.53 (s, 4H), 3.31 – 3.26 (m, 4H), 3.20 (dd,  $J = 10.5, 5.6 \text{ Hz}$ , 4H), 2.28 (dd,  $J = 14.7, 7.2 \text{ Hz}$ , 2H), 1.73 – 1.62 (m, 4H), 1.56 – 1.45 (m, 4H), 0.59 (t,  $J = 7.4 \text{ Hz}$ , 3H).

**<sup>13</sup>C NMR** (100 MHz, DMSO-*d*<sub>6</sub>)

$\delta$  172.5, 167.3, 162.9, 152.3, 148.8, 139.1, 127.1, 123.9, 114.7, 105.1, 66.7, 39.0, 38.0, 28.2, 26.7, 26.2, 9.3.

**HRMS ESI** (m/z)

Calcd for C<sub>28</sub>H<sub>36</sub>N<sub>6</sub>O<sub>7</sub>Na [M + Na]<sup>+</sup>: 591.2543; found: 591.2546.

***N*-{4,11,17,24-tetraoxo-2,26-dioxa-5,10,18,23,32-pentaazatricyclo[25.3.1.1<sup>12</sup>,16]dotriaconta-1(31),12,14,16(32),27,29-hexaen-31-yl}butanamide (5)**

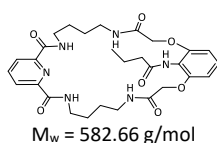

Following General Procedure **A** and using butyryl chloride (29  $\mu\text{L}$ , 0.28 mmol) the product **5** (0.128 g, 0.23 mmol, **98%**) was obtained as a colorless solid (mp 235-236  $^\circ\text{C}$ )

**<sup>1</sup>H NMR** (400 MHz, DMSO-*d*<sub>6</sub>)

$\delta$  9.45 (s, 1H), 9.38 (t,  $J = 5.2 \text{ Hz}$ , 2H), 8.39 (t,  $J = 4.8 \text{ Hz}$ , 2H), 8.22 – 8.08 (m, 3H), 7.15 (t,  $J = 8.3 \text{ Hz}$ , 1H), 6.68 (d,  $J = 8.4 \text{ Hz}$ , 2H), 4.53 (s, 4H), 3.29 (d,  $J = 6.1 \text{ Hz}$ , 4H), 3.20 (d,  $J = 4.6 \text{ Hz}$ , 4H), 2.23 (t,  $J = 7.3 \text{ Hz}$ , 2H), 1.69 (s, 4H), 1.51 (s, 4H), 1.23 – 1.12 (m, 2H), 0.36 (t,  $J = 7.2 \text{ Hz}$ , 3H).

**<sup>13</sup>C NMR** (100 MHz, DMSO-*d*<sub>6</sub>)

$\delta$  171.8, 167.2, 162.9, 152.2, 148.9, 139.1, 127.1, 123.9, 114.6, 104.9, 66.6, 38.9, 37.9, 37.0, 26.6, 26.2, 18.5, 12.9.

**HRMS ESI** (m/z)

Calcd for C<sub>29</sub>H<sub>38</sub>N<sub>6</sub>O<sub>7</sub>Na [M + Na]<sup>+</sup>: 605.2700; found: 605.2697.

***N*-{4,11,17,24-tetraoxo-2,26-dioxa-5,10,18,23,32-pentaazatricyclo[25.3.1.1<sup>12</sup>,16]dotriaconta-1(31),12,14,16(32),27,29-hexaen-31-yl}pentanamide (6)**

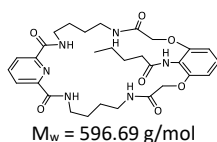

Following General Procedure **A** and using valeroyl chloride (33  $\mu\text{L}$ , 0.28 mmol) the product **6** (0.115 g, 0.19 mmol, **84%**) was obtained as a colorless solid (mp 247-248  $^\circ\text{C}$ )

**<sup>1</sup>H NMR** (400 MHz, DMSO-*d*<sub>6</sub>)

$\delta$  9.46 (s, 1H), 9.39 (t,  $J = 5.1 \text{ Hz}$ , 2H), 8.39 (bs, 2H), 8.22 – 8.10 (m, 3H), 7.15 (t,  $J = 8.3 \text{ Hz}$ , 1H), 6.68 (d,  $J = 8.4 \text{ Hz}$ , 2H), 4.53 (s, 4H), 3.31 – 3.26 (m, 4H), 3.23 – 3.18 (m, 4H), 2.26 (t,  $J = 7.4 \text{ Hz}$ , 2H), 1.70 (bs, 4H), 1.51 (bs, 4H), 1.21 – 1.11 (m, 2H), 0.85 – 0.75 (m, 2H), 0.41 (t,  $J = 7.2 \text{ Hz}$ , 3H).

**<sup>13</sup>C NMR** (100 MHz, DMSO-*d*<sub>6</sub>)

$\delta$  171.9, 167.2, 162.9, 152.3, 148.9, 139.1, 127.1, 123.9, 114.6, 104.9, 66.6, 38.9, 37.9, 34.8, 27.0, 26.6, 26.2, 21.3, 13.2.

**HRMS ESI** (m/z)

Calcd for C<sub>30</sub>H<sub>40</sub>N<sub>6</sub>O<sub>7</sub>Na [M + Na]<sup>+</sup>: 619.2856; found: 619.2861.

***N*-{4,11,17,24-tetraoxo-2,26-dioxa-5,10,18,23,32-pentaazatricyclo[25.3.1.1<sup>12</sup>,16]dotriaconta-1(31),12,14,16(32),27,29-hexaen-31-yl}hexanamide (7)**

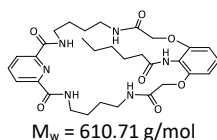

Following General Procedure **A** and using caproyl chloride (39  $\mu\text{L}$ , 0.28 mmol) the product **7** (0.117 g, 0.19 mmol, **83%**) was obtained as a colorless solid (mp 202-203  $^\circ\text{C}$ )

**<sup>1</sup>H NMR** (400 MHz, DMSO-*d*<sub>6</sub>)

$\delta$  9.46 (s, 1H), 9.39 (bs, 2H), 8.39 (bs, 2H), 8.23 – 8.10 (m, 3H), 7.15 (t,  $J = 7.2 \text{ Hz}$ , 1H), 6.68 (d,  $J = 7.3 \text{ Hz}$ , 2H), 4.52 (s, 4H), 3.31 – 3.28 (m, 4H), 3.23 – 3.18 (m, 4H), 2.25 (t,  $J = 5.2 \text{ Hz}$ , 2H), 1.74 – 1.66 (m, 4H), 1.56 – 1.48 (m, 4H), 1.16 (bs, 2H), 0.82 – 0.73 (m, 4H), 0.52 (t,  $J = 6.0 \text{ Hz}$ , 3H).

**<sup>13</sup>C NMR** (100 MHz, DMSO-*d*<sub>6</sub>)

$\delta$  172.0, 167.2, 162.9, 152.3, 148.9, 139.1, 127.1, 123.9, 114.6, 104.9, 66.6, 37.8, 35.2, 30.4, 26.6, 26.2, 24.9, 21.4, 13.6.

**HRMS ESI** (m/z)

Calcd for C<sub>31</sub>H<sub>42</sub>N<sub>6</sub>O<sub>7</sub>Na [M + Na]<sup>+</sup>: 633.3013; found: 633.3008.

**2-methyl-N-{4,11,17,24-tetraoxo-2,26-dioxa-5,10,18,23,32-pentaazatricyclo[25.3.1.1<sup>12</sup>,<sup>16</sup>]dotriaconta-1(31),12,14,16(32),27,29-hexaen-31-yl}propanamide (8)**

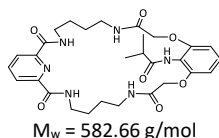

Following General Procedure A and using isopropyl chloride (22 mg, 0.28 mmol) the product **8** (0.130 g, 0.22 mmol, **97%**) was obtained as a colorless solid (mp 220-221 °C)

**<sup>1</sup>H NMR** (400 MHz, DMSO-*d*<sub>6</sub>)

δ 9.37 – 9.31 (m, 3H), 8.28 (t, *J* = 4.7 Hz, 2H), 8.20 – 8.09 (m, 3H), 7.15 (t, *J* = 8.3 Hz, 1H), 6.67 (d, *J* = 8.5 Hz, 2H), 4.54 (s, 4H), 3.32 – 3.26 (m, 4H), 3.23 – 3.17 (m, 4H), 1.72 – 1.61 (m, 4H), 1.55 – 1.46 (m, 4H), 1.17 (s, 1H), 0.81 (d, *J* = 6.7 Hz, 6H).

**<sup>13</sup>C NMR** (100 MHz, DMSO-*d*<sub>6</sub>)

δ 175.8, 167.3, 162.9, 152.4, 148.8, 139.1, 127.0, 123.8, 114.7, 105.0, 66.7, 38.1, 33.5, 27.9, 26.7, 26.2, 19.4.

**HRMS ESI** (*m/z*)

Calcd for C<sub>29</sub>H<sub>38</sub>N<sub>6</sub>O<sub>7</sub>Na [*M* + Na]<sup>+</sup>: 605.2700; found: 605.2697.

**2,2-dimethyl-N-{4,11,17,24-tetraoxo-2,26-dioxa-5,10,18,23,32-pentaazatricyclo[25.3.1.1<sup>12</sup>,<sup>16</sup>]dotriaconta-1(31),12,14,16(32),27,29-hexaen-31-yl}propanamide (9)**

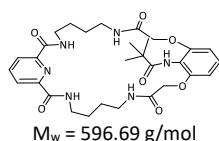

Following General Procedure A and using pivaloyl chloride (35 μL, 0.28 mmol) the product **9** (0.108 g, 0.18 mmol, **79%**) was obtained as a colorless solid (mp 161-162 °C)

**<sup>1</sup>H NMR** (400 MHz, DMSO-*d*<sub>6</sub>)

δ 9.32 (bs, 2H), 8.94 (s, 1H), 8.22 – 8.09 (m, 3H), 7.94 (s, 2H), 7.16 (d, *J* = 7.6 Hz, 1H), 6.68 (d, *J* = 6.6 Hz, 2H), 4.54 (s, 4H), 3.29 (bs, 4H), 3.18 (bs, 4H), 1.64 (bs, 4H), 1.49 (bs, 4H), 0.97 (s, 9H).

**<sup>13</sup>C NMR** (100 MHz, DMSO-*d*<sub>6</sub>)

δ 177.5, 167.4, 163.0, 153.2, 148.8, 127.4, 123.9, 115.2, 105.3, 66.8, 38.4, 38.2, 27.2, 26.9, 26.3.

**HRMS ESI** (*m/z*)

Calcd for C<sub>30</sub>H<sub>40</sub>N<sub>6</sub>O<sub>7</sub>Na [*M* + Na]<sup>+</sup>: 619.2856; found: 619.2845.

**N-{4,11,17,24-tetraoxo-2,26-dioxa-5,10,18,23,32-pentaazatricyclo[25.3.1.1<sup>12</sup>,<sup>16</sup>]dotriaconta-1(31),12,14,16(32),27,29-hexaen-31-yl}cyclohexanecarboxamide (10)**

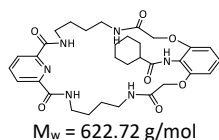

Following General Procedure A and using cyclohexanecarbonyl chloride (37 μL, 0.28 mmol) the product **10** (0.125 g, 0.20 mmol, **87%**) was obtained as a colorless solid (mp 268-269 °C)

**<sup>1</sup>H NMR** (400 MHz, DMSO-*d*<sub>6</sub>)

δ 9.44 – 9.27 (m, 3H), 8.36 (s, 2H), 8.22 – 8.07 (m, 3H), 7.15 (t, *J* = 7.3 Hz, 1H), 6.66 (d, *J* = 7.5 Hz, 2H), 4.53 (s, 4H), 3.30 – 3.16 (m, 8H), 2.37 (t, *J* = 11.0 Hz, 1H), 1.71 (bs, 6H), 1.50 (bs, 4H), 1.25 – 1.05 (m, 6H), 0.99 – 0.85 (m, 2H).

**<sup>13</sup>C NMR** (100 MHz, DMSO-*d*<sub>6</sub>)

δ 174.8, 167.3, 162.8, 152.2, 148.8, 139.0, 126.9, 123.8, 114.6, 104.8, 66.6, 43.4, 37.9, 29.2, 26.5, 26.2, 24.9, 24.9.

**HRMS ESI** (*m/z*)

Calcd for C<sub>32</sub>H<sub>42</sub>N<sub>6</sub>O<sub>7</sub>Na [*M* + Na]<sup>+</sup>: 645.3013; found: 645.3008.

**N-{4,11,17,24-tetraoxo-2,26-dioxa-5,10,18,23,32-pentaazatricyclo[25.3.1.1<sup>12</sup>,<sup>16</sup>]dotriaconta-1(31),12,14,16(32),27,29-hexaen-31-yl}benzamide (11)**

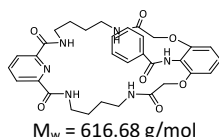

Following General Procedure A and using benzoyl chloride (33 μL, 0.28 mmol) the product **11** (0.136 g, 0.22 mmol, **96%**) was obtained as a colorless solid (mp 283-284 °C)

**<sup>1</sup>H NMR** (400 MHz, DMSO-*d*<sub>6</sub>)

δ 9.99 (s, 1H), 9.33 (t, *J* = 6.1 Hz, 2H), 8.26 – 8.16 (m, 3H), 8.08 (t, *J* = 5.4 Hz, 2H), 7.90 (d, *J* = 7.5 Hz, 2H), 7.30 (t, *J* = 7.4 Hz, 1H), 7.23 (t, *J* = 8.4 Hz, 1H), 6.89 (t, *J* = 7.8 Hz, 2H), 6.72 (d, *J* = 8.5 Hz, 2H), 4.57 (s, 4H), 3.19 (d, *J* = 5.8 Hz, 4H), 3.12 (d, *J* = 4.8 Hz, 4H), 1.41 (s, 8H).

**<sup>13</sup>C NMR** (100 MHz, DMSO-*d*<sub>6</sub>)

δ 167.3, 166.1, 162.8, 152.9, 149.0, 139.3, 133.6, 131.4, 128.0, 127.7, 127.6, 124.0, 114.9, 105.3, 66.8, 38.8, 37.8, 26.1.

**HRMS ESI** (*m/z*)

Calcd for C<sub>32</sub>H<sub>36</sub>N<sub>6</sub>O<sub>7</sub>Na [*M* + Na]<sup>+</sup>: 639.2543; found: 639.2542.

***N*-{4,11,17,24-tetraoxo-2,26-dioxa-5,10,18,23,32-pentaazatricyclo[25.3.1.1<sup>12</sup>,16]dotriaconta-1(31),12,14,16(32),27,29-hexaen-31-yl}naphthalene-1-carboxamide (12)**

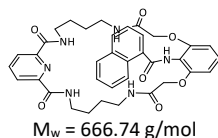

Following General Procedure A and using 1-naphthoyl chloride (42  $\mu\text{L}$ , 0.28 mmol) the product **12** (0.152 g, 0.23 mmol, **99%**) was obtained as a colorless solid (mp 164-165  $^\circ\text{C}$ )

**<sup>1</sup>H NMR** (400 MHz, DMSO-*d*<sub>6</sub>)

$\delta$  10.18 (s, 1H), 9.44 (t,  $J = 5.3 \text{ Hz}$ , 2H), 8.41 (d,  $J = 7.8 \text{ Hz}$ , 1H), 8.29 (t,  $J = 5.3 \text{ Hz}$ , 2H), 8.22 – 8.11 (m, 3H), 7.87 (dd,  $J = 13.1, 8.2 \text{ Hz}$ , 2H), 7.73 (d,  $J = 6.6 \text{ Hz}$ , 1H), 7.53 – 7.44 (m, 2H), 7.24 (t,  $J = 8.3 \text{ Hz}$ , 1H), 6.98 (t,  $J = 7.5 \text{ Hz}$ , 1H), 6.75 (d,  $J = 8.4 \text{ Hz}$ , 2H), 4.64 (s, 4H), 3.30 – 3.24 (m, 4H), 3.18 – 3.09 (m, 4H), 1.58 (bs, 4H), 1.45 (bs, 4H).

**<sup>13</sup>C NMR** (100 MHz, DMSO-*d*<sub>6</sub>)

$\delta$  167.8, 167.3, 163.0, 152.6, 148.9, 139.2, 134.7, 132.8, 129.9, 129.8, 128.1, 127.5, 126.8, 126.1, 125.8, 125.3, 124.3, 124.0, 114.6, 105.2, 67.0, 38.9, 37.8, 26.6, 26.2.

**HRMS ESI** (m/z)

Calcd for C<sub>36</sub>H<sub>38</sub>N<sub>6</sub>O<sub>7</sub>Na [M + Na]<sup>+</sup>: 689.2700; found: 689.2693.

***N*-{4,11,17,24-tetraoxo-2,26-dioxa-5,10,18,23,32-pentaazatricyclo[25.3.1.1<sup>12</sup>,16]dotriaconta-1(31),12,14,16(32),27,29-hexaen-31-yl}naphthalene-2-carboxamide (13)**

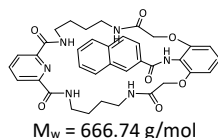

Following General Procedure A and using 2-naphthoyl chloride (54 mg, 0.28 mmol) the product **13** (0.149 g, 0.22 mmol, **97%**) was obtained as a colorless solid (mp 158-159  $^\circ\text{C}$ )

**<sup>1</sup>H NMR** (400 MHz, DMSO-*d*<sub>6</sub>)

$\delta$  10.18 (s, 1H), 9.31 (bs, 2H), 8.59 (s, 1H), 8.21 (s, 3H), 8.16 (s, 2H), 7.94 (d,  $J = 8.2 \text{ Hz}$ , 1H), 7.69 (t,  $J = 8.2 \text{ Hz}$ , 2H), 7.53 (t,  $J = 7.3 \text{ Hz}$ , 1H), 7.42 (t,  $J = 7.2 \text{ Hz}$ , 1H), 7.25 (t,  $J = 8.3 \text{ Hz}$ , 1H), 7.16 (d,  $J = 8.3 \text{ Hz}$ , 1H), 6.75 (d,  $J = 8.4 \text{ Hz}$ , 2H), 4.60 (s, 4H), 3.14 (bs, 8H), 1.40 (bs, 8H).

**<sup>13</sup>C NMR** (100 MHz, DMSO-*d*<sub>6</sub>)

$\delta$  167.4, 166.1, 162.8, 152.9, 148.9, 139.2, 134.1, 131.7, 130.1, 128.5, 128.4, 127.7 (x2), 127.4, 127.2, 126.5, 124.7, 124.0, 115.0, 105.3, 66.9, 38.7, 37.7, 26.1 (x2).

**HRMS ESI** (m/z)

Calcd for C<sub>36</sub>H<sub>38</sub>N<sub>6</sub>O<sub>7</sub>Na [M + Na]<sup>+</sup>: 689.2700; found: 689.2694.

**4-methoxy-*N*-{4,11,17,24-tetraoxo-2,26-dioxa-5,10,18,23,32-pentaazatricyclo[25.3.1.1<sup>12</sup>,16]dotriaconta-1(31),12,14,16(32),27,29-hexaen-31-yl}benzamide (14)**

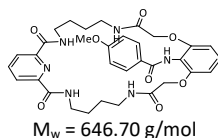

Following General Procedure A and using 4-anisoyl chloride (36  $\mu\text{L}$ , 0.28 mmol) the product **14** (0.140 g, 0.22 mmol, **94%**) was obtained as a colorless solid (mp 233-234  $^\circ\text{C}$ )

**<sup>1</sup>H NMR** (400 MHz, DMSO-*d*<sub>6</sub>)

$\delta$  9.83 (s, 1H), 9.34 (t,  $J = 6.1 \text{ Hz}$ , 2H), 8.28 – 8.15 (m, 3H), 8.08 (t,  $J = 5.4 \text{ Hz}$ , 2H), 7.88 (d,  $J = 8.8 \text{ Hz}$ , 2H), 7.22 (t,  $J = 8.4 \text{ Hz}$ , 1H), 6.72 (d,  $J = 8.5 \text{ Hz}$ , 2H), 6.35 (d,  $J = 8.8 \text{ Hz}$ , 2H), 4.56 (s, 4H), 3.59 (s, 3H), 3.22 – 3.18 (m, 4H), 3.12 (d,  $J = 5.0 \text{ Hz}$ , 4H), 1.41 (s, 8H).

**<sup>13</sup>C NMR** (100 MHz, DMSO-*d*<sub>6</sub>)

$\delta$  167.4, 165.6, 162.8, 161.7, 152.9, 149.0, 139.3, 129.9, 127.6, 125.7, 124.0, 115.1, 112.8, 105.3, 66.8, 55.0, 38.8, 37.8, 26.1, 26.0.

**HRMS ESI** (m/z)

Calcd for C<sub>33</sub>H<sub>38</sub>N<sub>6</sub>O<sub>8</sub>Na [M + Na]<sup>+</sup>: 669.2649; found: 669.2646.

**4-chloro-*N*-{4,11,17,24-tetraoxo-2,26-dioxa-5,10,18,23,32-pentaazatricyclo[25.3.1.1<sup>12</sup>,16]dotriaconta-1(31),12,14,16(32),27,29-hexaen-31-yl}benzamide (15)**

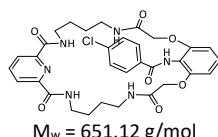

Following General Procedure A and using 2-naphthoyl chloride (36  $\mu\text{L}$ , 0.28 mmol) the product **15** (0.133 g, 0.20 mmol, **89%**) was obtained as a colorless solid (mp 255-256  $^\circ\text{C}$ )

**<sup>1</sup>H NMR** (400 MHz, DMSO-*d*<sub>6</sub>)

$\delta$  10.08 (s, 1H), 9.31 (t,  $J = 5.6 \text{ Hz}$ , 2H), 8.27 – 8.18 (m, 3H), 8.10 (t,  $J = 5.6 \text{ Hz}$ , 2H), 7.92 (d,  $J = 8.2 \text{ Hz}$ , 2H), 7.24 (t,  $J = 8.4 \text{ Hz}$ , 1H), 6.87 (d,  $J = 8.2 \text{ Hz}$ , 2H), 6.73 (d,  $J = 8.5 \text{ Hz}$ , 2H), 4.58 (s, 4H), 3.20 (bs, 4H), 3.15 (bs, 4H), 1.43 (bs, 8H).

**<sup>13</sup>C NMR** (100 MHz, DMSO-*d*<sub>6</sub>)

$\delta$  167.3, 164.9, 162.7, 152.8, 148.9, 139.3, 136.3, 132.2, 129.8, 127.8, 127.7, 124.1, 114.6, 105.3, 66.8, 38.8, 37.8, 26.2, 26.1.

**HRMS ESI** (m/z)

Calcd for C<sub>32</sub>H<sub>35</sub>N<sub>6</sub>O<sub>7</sub>ClNa [M + Na]<sup>+</sup>: 673.2153; found: 673.2153.

**4-cyano-N-{4,11,17,24-tetraoxo-2,26-dioxa-5,10,18,23,32-pentaazatricyclo[25.3.1.1<sup>12,16</sup>]dotriaconta-1(31),12,14,16(32),27,29-hexaen-31-yl}benzamide (16)**

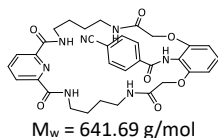

Following General Procedure **A** and using 4-cyanobenzoyl chloride (46 mg, 0.28 mmol) the product **16** (0.137 g, 0.21 mmol, **93%**) was obtained as a colorless solid (mp 276-277 °C (decomposition))

**<sup>1</sup>H NMR** (400 MHz, DMSO-*d*<sub>6</sub>)

δ 10.26 (s, 1H), 9.26 (t, *J* = 5.7 Hz, 2H), 8.27 – 8.18 (m, 3H), 8.10 (t, *J* = 4.8 Hz, 2H), 8.04 (d, *J* = 8.0 Hz, 2H), 7.33 – 7.22 (m, 3H), 6.74 (d, *J* = 8.5 Hz, 2H), 4.58 (s, 4H), 3.17 (bs, 8H), 1.44 (bs, 8H).

**<sup>13</sup>C NMR** (100 MHz, DMSO-*d*<sub>6</sub>)

δ 167.3, 164.3, 162.7, 152.8, 148.9, 139.3, 137.4, 131.6, 128.7, 128.1, 124.1, 118.0, 114.2, 109.5, 105.3, 66.8, 38.8, 37.8, 26.3, 26.0.

**HRMS ESI** (m/z)

Calcd for C<sub>33</sub>H<sub>35</sub>N<sub>7</sub>O<sub>7</sub>Na [M + Na]<sup>+</sup>: 664.2496; found: 664.2496.

**4-nitro-N-{4,11,17,24-tetraoxo-2,26-dioxa-5,10,18,23,32-pentaazatricyclo[25.3.1.1<sup>12,16</sup>]dotriaconta-1(31),12,14,16(32),27,29-hexaen-31-yl}benzamide (17)**

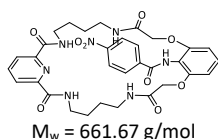

Following General Procedure **A** and using 4-nitrobenzoyl chloride (52 mg, 0.28 mmol) the product **17** (0.145 g, 0.22 mmol, **95%**) was obtained as a yellow solid (mp 168-169 °C)

**<sup>1</sup>H NMR** (400 MHz, DMSO-*d*<sub>6</sub>)

δ 10.36 (s, 1H), 9.30 (t, *J* = 6.0 Hz, 2H), 8.21 (s, 3H), 8.16-8.09 (m, 4H), 7.65 (d, *J* = 8.7 Hz, 2H), 7.27 (t, *J* = 8.4 Hz, 1H), 6.75 (d, *J* = 8.5 Hz, 2H), 4.59 (s, 4H), 3.18 (dd, *J* = 13.6, 5.0 Hz, 8H), 1.44 (bs, 8H).

**<sup>13</sup>C NMR** (100 MHz, DMSO-*d*<sub>6</sub>)

δ 167.3, 164.1, 162.7, 152.7, 148.9, 148.8, 139.3, 139.1, 129.4, 128.1, 124.1, 122.7, 114.1, 105.3, 66.8, 38.8, 37.8, 26.3, 26.1.

**HRMS ESI** (m/z)

Calcd for C<sub>32</sub>H<sub>35</sub>N<sub>7</sub>O<sub>9</sub>Na [M + Na]<sup>+</sup>: 684.2389; found: 684.2412.

**3-nitro-N-{4,11,17,24-tetraoxo-2,26-dioxa-5,10,18,23,32-pentaazatricyclo[25.3.1.1<sup>12,16</sup>]dotriaconta-1(31),12,14,16(32),27,29-hexaen-31-yl}benzamide (18)**

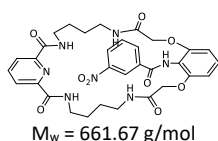

Following General Procedure **A** and using 3-nitrobenzoyl chloride (52 mg, 0.28 mmol) the product **18** (0.146 g, 0.22 mmol, **96%**) was obtained as a yellowish solid (mp 192-193 °C)

**<sup>1</sup>H NMR** (400 MHz, DMSO-*d*<sub>6</sub>)

δ 10.39 (s, 1H), 9.18 (t, *J* = 5.7 Hz, 2H), 8.80 (s, 1H), 8.32 (d, *J* = 7.5 Hz, 1H), 8.22 – 8.13 (m, 6H), 7.27 (t, *J* = 8.4 Hz, 1H), 7.04 (t, *J* = 7.9 Hz, 1H), 6.75 (d, *J* = 8.5 Hz, 2H), 4.60 (s, 4H), 3.17 (bs, 8H), 1.46 (bs, 8H).

**<sup>13</sup>C NMR** (100 MHz, DMSO-*d*<sub>6</sub>)

δ 167.3, 163.5, 162.8, 152.8, 148.8, 147.2, 139.1, 134.8, 134.2, 129.3, 128.1, 126.1, 124.0, 122.7, 114.0, 105.2, 66.8, 38.7, 37.6, 26.1, 26.0.

**HRMS ESI** (m/z)

Calcd for C<sub>32</sub>H<sub>35</sub>N<sub>7</sub>O<sub>9</sub>Na [M + Na]<sup>+</sup>: 684.2389; found: 684.2394.

**2-nitro-N-{4,11,17,24-tetraoxo-2,26-dioxa-5,10,18,23,32-pentaazatricyclo[25.3.1.1<sup>12,16</sup>]dotriaconta-1(31),12,14,16(32),27,29-hexaen-31-yl}benzamide (19)**

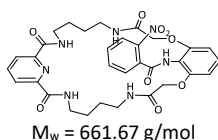

Following General Procedure **A** and using 2-nitrobenzoyl chloride (37 μL, 0.28 mmol) the product **19** (0.145 g, 0.22 mmol, **95%**) was obtained as a yellowish solid (mp 167-168 °C)

**<sup>1</sup>H NMR** (400 MHz, DMSO-*d*<sub>6</sub>)

δ 10.22 (s, 1H), 9.17 (bt, *J* = 5.8 Hz, 2H), 8.18 – 8.08 (m, 3H), 8.02 (bt, *J* = 5.1 Hz, 2H), 7.88 (d, *J* = 7.7 Hz, 1H), 7.78 (d, *J* = 6.9 Hz, 1H), 7.59 – 7.49 (m, 2H), 7.22 (t, *J* = 8.4 Hz, 1H), 6.72 (d, *J* = 8.5 Hz, 2H), 4.59 (s, 4H), 3.28 – 3.21 (m, 4H), 3.20 – 3.15 (m, 4H), 1.58 – 1.49 (m, 4H), 1.45 (bs, 4H).

**<sup>13</sup>C NMR** (100 MHz, DMSO-*d*<sub>6</sub>)

δ 167.3, 164.5, 162.9, 153.0, 148.8, 147.0, 139.1, 133.1, 131.6, 131.0, 129.6, 127.9, 124.0, 123.8, 113.8, 105.3, 67.0, 38.8, 37.9, 26.8, 26.4.

**HRMS ESI** (m/z)

Calcd for C<sub>32</sub>H<sub>35</sub>N<sub>7</sub>O<sub>9</sub>Na [M + Na]<sup>+</sup>: 684.2389; found: 684.2388.

### 1.3. Conversions observed in combinatorial experiments

**Table S1.** Conversions of macrocyclic compound **2** in combinatorial experiments<sup>a</sup>

| Entry | Compound | Template                           | Conversion [%] |     |                |                |                |                |                |                |                |                |      |                |     |                |                |                |                |
|-------|----------|------------------------------------|----------------|-----|----------------|----------------|----------------|----------------|----------------|----------------|----------------|----------------|------|----------------|-----|----------------|----------------|----------------|----------------|
|       |          |                                    | A              | B   | C              | D              | E              | F              | G              | H              | I              | J              | K    | L              | M   | N              | O              | P              | Q              |
| 1     | A        | Untemplated                        |                | 81  | 73             | 77             | 71             | 78             | 90             | 70             | 75             | 82             | 73   | 77             | 73  | 77             | 77             | 78             | 76             |
|       |          | TBA-H <sub>2</sub> PO <sub>4</sub> |                | 71  | 73             | 82             | 77             | 81             | 80             | 75             | 77             | 74             | 76   | 78             | 77  | 74             | 71             | 72             | 71             |
| 2     | B        | Untemplated                        | 81             |     | 80             | 75             | 85             | 92             | 96             | 95             | 98             | 100            | 97   | 99             | 98  | 100            | 100            | 98             | 100            |
|       |          | TBA-H <sub>2</sub> PO <sub>4</sub> | 71             |     | 73             | 79             | 68             | 55             | 73             | 80             | 38             | 75             | 55   | 84             | 20  | 32             | 15             | 14             | 19             |
| 3     | C        | Untemplated                        | 73             | 80  |                | 77             | 91             | - <sup>b</sup> | 99             | 91             | 100            | 100            | 98   | 97             | 100 | - <sup>b</sup> | 97             | 99             | - <sup>b</sup> |
|       |          | TBA-H <sub>2</sub> PO <sub>4</sub> | 73             | 73  |                | 48             | 55             | - <sup>b</sup> | 81             | 77             | 39             | 43             | 76   | 84             | 19  | - <sup>b</sup> | 17             | 13             | - <sup>b</sup> |
| 4     | D        | Untemplated                        | 77             | 75  | 77             |                | 93             | 97             | - <sup>b</sup> | 99             | 99             | 95             | 97   | - <sup>b</sup> | 100 | 99             | - <sup>b</sup> | 98             | 94             |
|       |          | TBA-H <sub>2</sub> PO <sub>4</sub> | 82             | 79  | 48             |                | 77             | 79             | - <sup>b</sup> | 81             | 83             | 81             | 81   | - <sup>b</sup> | 82  | 81             | - <sup>b</sup> | 81             | 81             |
| 5     | E        | Untemplated                        | 71             | 85  | 91             | 93             |                | 100            | 97             | - <sup>b</sup> | 100            | - <sup>b</sup> | 1008 | 99             | 99  | 98             | 100            | 98             | 99             |
|       |          | TBA-H <sub>2</sub> PO <sub>4</sub> | 77             | 68  | 55             | 77             |                | 68             | 59             | - <sup>b</sup> | 53             | - <sup>b</sup> | 2    | 93             | 36  | 55             | 25             | 20             | 34             |
| 6     | F        | Untemplated                        | 78             | 92  | - <sup>b</sup> | 97             | 100            |                | 100            | 99             | 99             | 98             | 99   | 96             | 100 | - <sup>b</sup> | 99             | 99             | - <sup>b</sup> |
|       |          | TBA-H <sub>2</sub> PO <sub>4</sub> | 81             | 55  | - <sup>b</sup> | 79             | 68             |                | 49             | 55             | 34             | 56             | 62   | 85             | 22  | - <sup>b</sup> | 17             | 13             | - <sup>b</sup> |
| 7     | G        | Untemplated                        | 90             | 96  | 99             | - <sup>b</sup> | 97             | 100            |                | 100            | - <sup>b</sup> | 96             | 99   | - <sup>b</sup> | 98  | 95             | - <sup>b</sup> | 100            | 98             |
|       |          | TBA-H <sub>2</sub> PO <sub>4</sub> | 80             | 73  | 81             | - <sup>b</sup> | 59             | 49             |                | 61             | - <sup>b</sup> | 76             | 59   | - <sup>b</sup> | 49  | 61             | - <sup>b</sup> | 50             | 55             |
| 8     | H        | Untemplated                        | 70             | 95  | 91             | 99             | - <sup>b</sup> | 99             | 100            |                | 95             | - <sup>b</sup> | 97   | 100            | 91  | 95             | 99             | 100            | 98             |
|       |          | TBA-H <sub>2</sub> PO <sub>4</sub> | 75             | 80  | 77             | 81             | - <sup>b</sup> | 55             | 61             |                | 34             | - <sup>b</sup> | 65   | 83             | 17  | 11             | 23             | 10             | 15             |
| 9     | I        | Untemplated                        | 75             | 98  | 100            | 99             | 100            | 99             | - <sup>b</sup> | 95             |                | 95             | 97   | 95             | 98  | 98             | - <sup>b</sup> | - <sup>b</sup> | 100            |
|       |          | TBA-H <sub>2</sub> PO <sub>4</sub> | 77             | 38  | 39             | 83             | 53             | 34             | - <sup>b</sup> | 34             |                | 80             | 80   | 86             | 76  | 78             | - <sup>b</sup> | - <sup>b</sup> | 77             |
| 10    | J        | Untemplated                        | 82             | 100 | 100            | 95             | - <sup>b</sup> | 98             | 96             | - <sup>b</sup> | 95             |                | 99   | 98             | 100 | 97             | 96             | 99             | 98             |
|       |          | TBA-H <sub>2</sub> PO <sub>4</sub> | 74             | 75  | 43             | 81             | - <sup>b</sup> | 56             | 76             | - <sup>b</sup> | 80             |                | 83   | 88             | 81  | 78             | 74             | 73             | 74             |
| 11    | K        | Untemplated                        | 73             | 97  | 98             | 97             | 100            | 99             | 99             | 97             | 97             | 99             |      | 100            | 96  | 99             | 97             | 97             | 94             |
|       |          | TBA-H <sub>2</sub> PO <sub>4</sub> | 76             | 55  | 76             | 81             | 82             | 62             | 59             | 65             | 80             | 83             |      | 91             | 83  | 82             | 77             | 76             | 78             |
| 12    | L        | Untemplated                        | 77             | 99  | 97             | - <sup>b</sup> | 99             | 96             | - <sup>b</sup> | 100            | 95             | 98             | 100  |                | 98  | 99             | - <sup>b</sup> | 99             | 100            |
|       |          | TBA-H <sub>2</sub> PO <sub>4</sub> | 78             | 84  | 84             | - <sup>b</sup> | 93             | 85             | - <sup>b</sup> | 83             | 86             | 88             | 91   |                | 89  | 90             | - <sup>b</sup> | 83             | 87             |
| 13    | M        | Untemplated                        | 73             | 98  | 100            | 100            | 99             | 100            | 98             | 91             | 98             | 100            | 96   | 98             |     | 97             | 99             | 99             | 96             |
|       |          | TBA-H <sub>2</sub> PO <sub>4</sub> | 77             | 20  | 19             | 82             | 36             | 22             | 49             | 17             | 76             | 81             | 83   | 89             |     | 82             | 74             | 73             | 74             |
| 14    | N        | Untemplated                        | 77             | 100 | - <sup>b</sup> | 99             | 98             | - <sup>b</sup> | 95             | 95             | 98             | 97             | 99   | 99             | 97  |                | 97             | 94             | - <sup>b</sup> |
|       |          | TBA-H <sub>2</sub> PO <sub>4</sub> | 74             | 32  | - <sup>b</sup> | 81             | 55             | - <sup>b</sup> | 61             | 11             | 78             | 78             | 82   | 90             | 82  |                | 71             | 73             | - <sup>b</sup> |
| 15    | O        | Untemplated                        | 77             | 100 | 97             | - <sup>b</sup> | 100            | 99             | - <sup>b</sup> | 99             | - <sup>b</sup> | 96             | 97   | - <sup>b</sup> | 99  | 97             |                | 100            | 99             |
|       |          | TBA-H <sub>2</sub> PO <sub>4</sub> | 71             | 15  | 17             | - <sup>b</sup> | 25             | 17             | - <sup>b</sup> | 23             | - <sup>b</sup> | 74             | 77   | - <sup>b</sup> | 74  | 71             |                | 68             | 72             |
| 16    | P        | Untemplated                        | 78             | 98  | 99             | 98             | 98             | 99             | 100            | 100            | - <sup>b</sup> | 99             | 97   | 99             | 99  | 94             | 100            |                | 99             |
|       |          | TBA-H <sub>2</sub> PO <sub>4</sub> | 72             | 14  | 13             | 81             | 20             | 13             | 50             | 10             | - <sup>b</sup> | 73             | 76   | 83             | 73  | 73             | 68             |                | 65             |
| 17    | Q        | Untemplated                        | 76             | 100 | - <sup>b</sup> | 94             | 99             | - <sup>b</sup> | 98             | 98             | 100            | 98             | 94   | 100            | 96  | - <sup>b</sup> | 99             | 99             |                |
|       |          | TBA-H <sub>2</sub> PO <sub>4</sub> | 71             | 19  | - <sup>b</sup> | 81             | 34             | - <sup>b</sup> | 55             | 15             | 77             | 74             | 78   | 87             | 74  | - <sup>b</sup> | 72             | 65             |                |

<sup>a</sup> Determined using HPLC analysis, <sup>b</sup> Impossible to determine due to overlapping signals

## 2. Copies of $^1\text{H}$ and $^{13}\text{C}$ NMR spectra

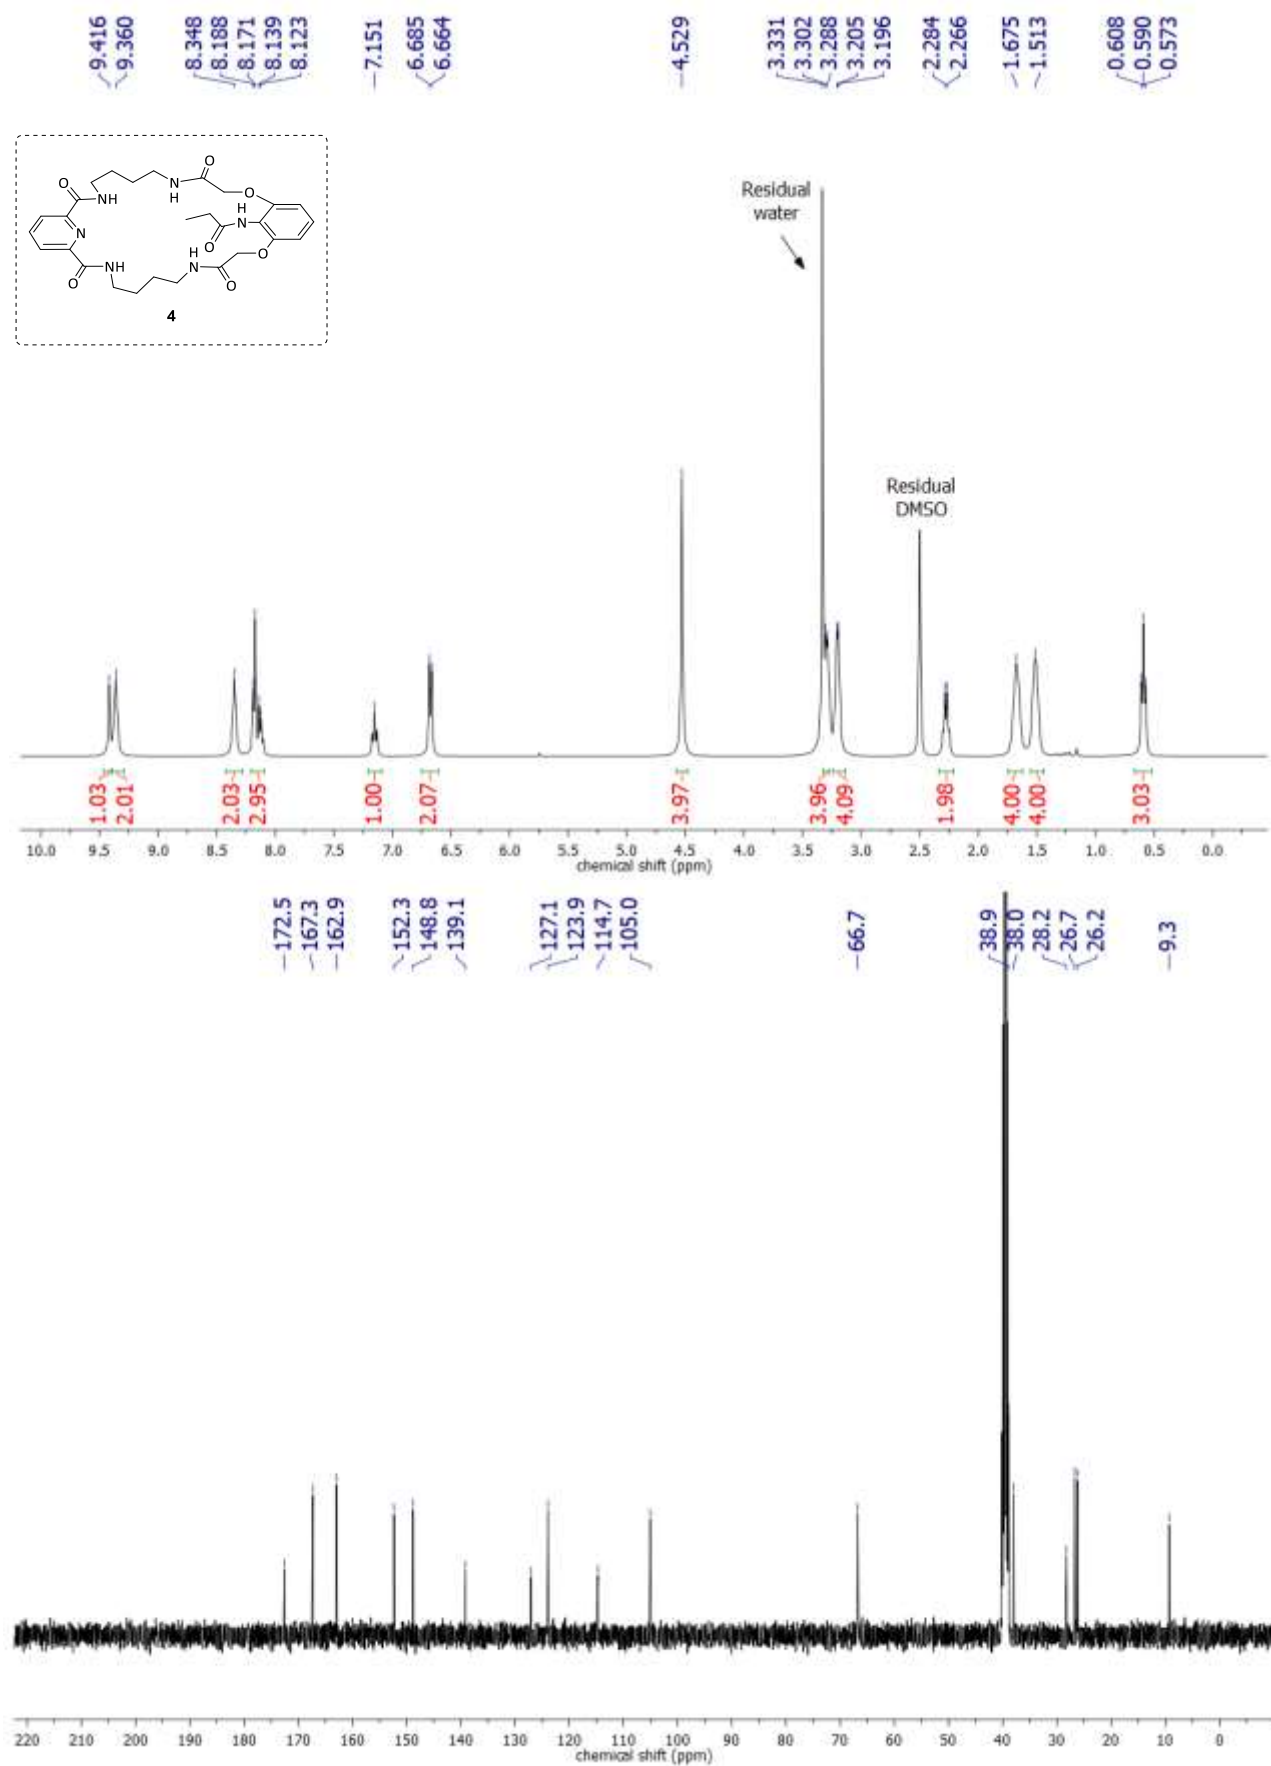

Figure S1.  $^1\text{H}$  NMR (400 MHz) and  $^{13}\text{C}$  NMR (100 MHz) spectra of compound 4 in  $\text{DMSO}-d_6$ .



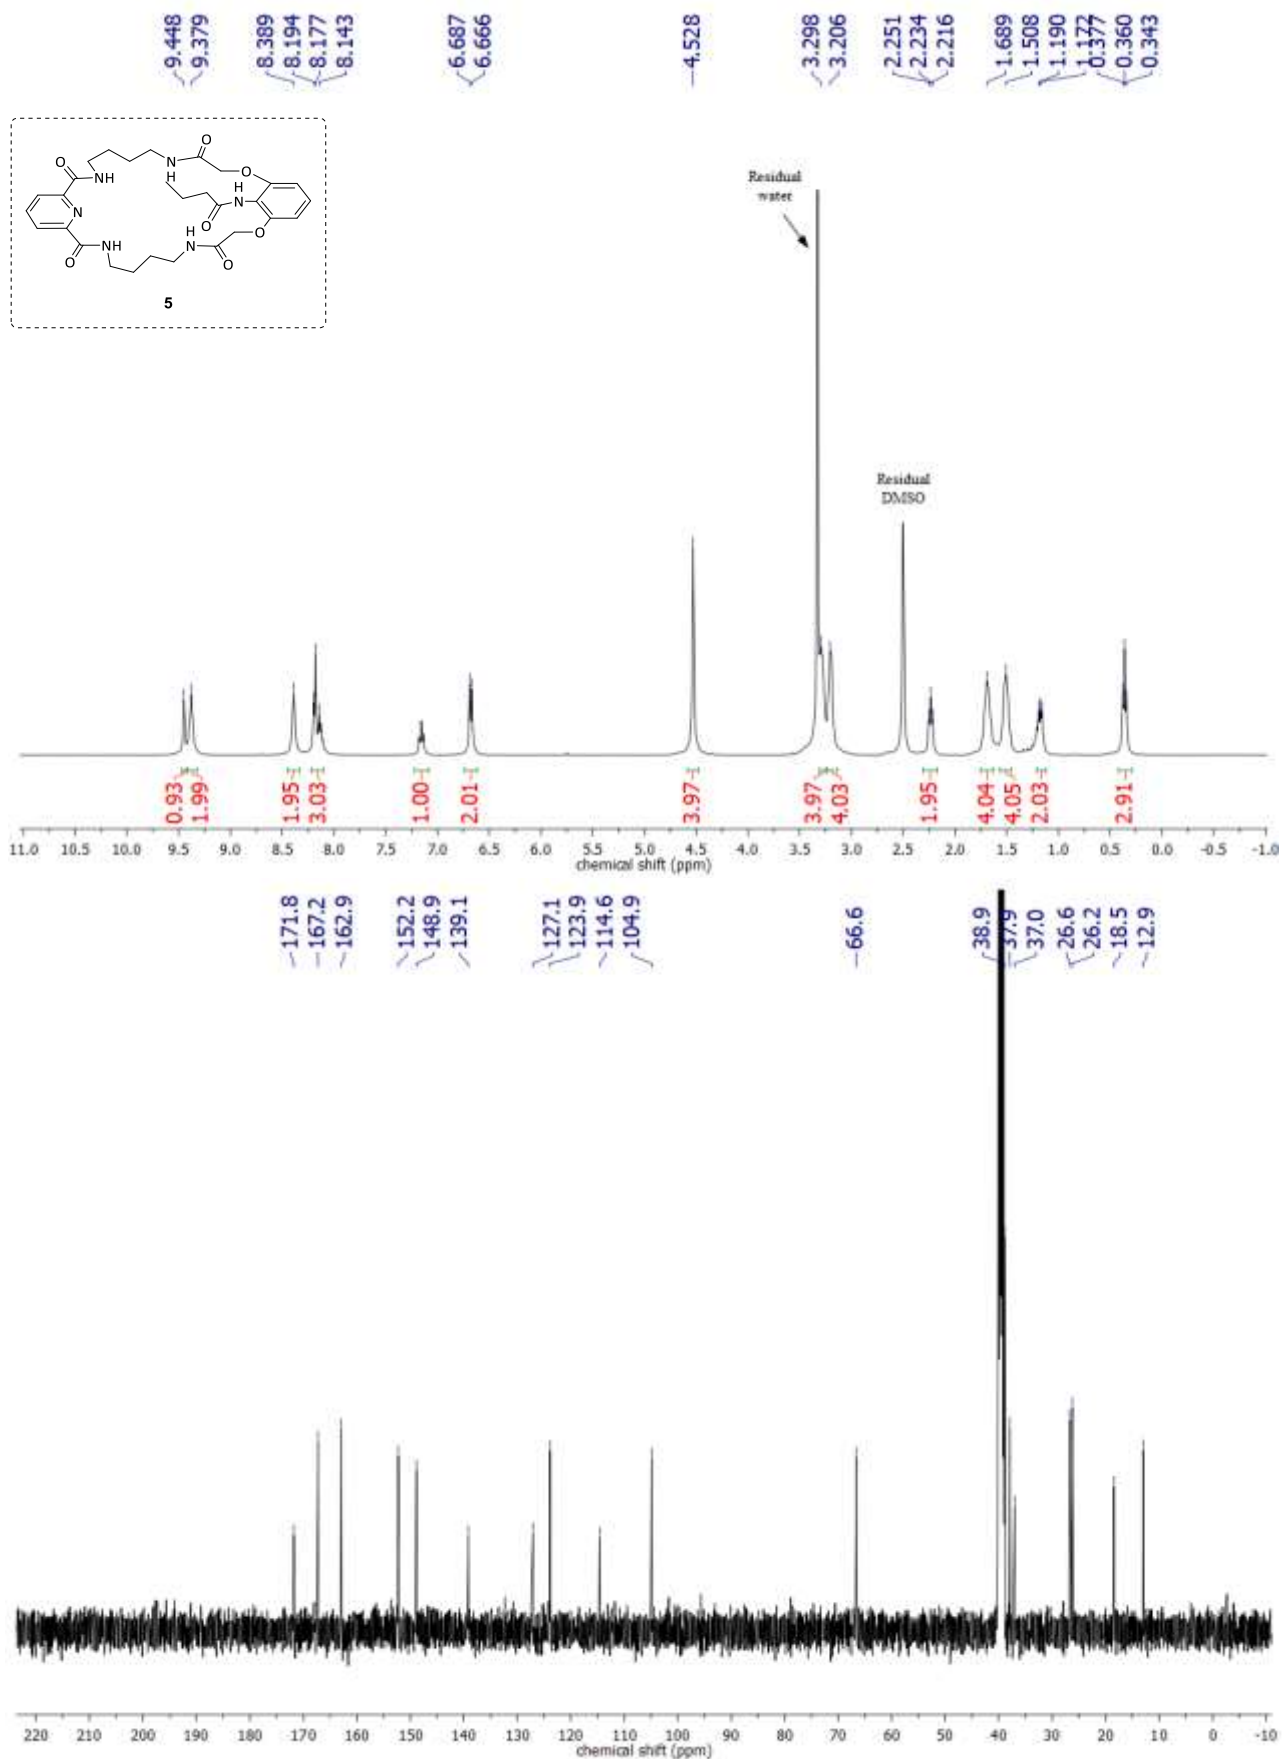

**Figure S2.** <sup>1</sup>H NMR (400 MHz) and <sup>13</sup>C NMR (100 MHz) spectra of compound **5** in DMSO-*d*<sub>6</sub>.

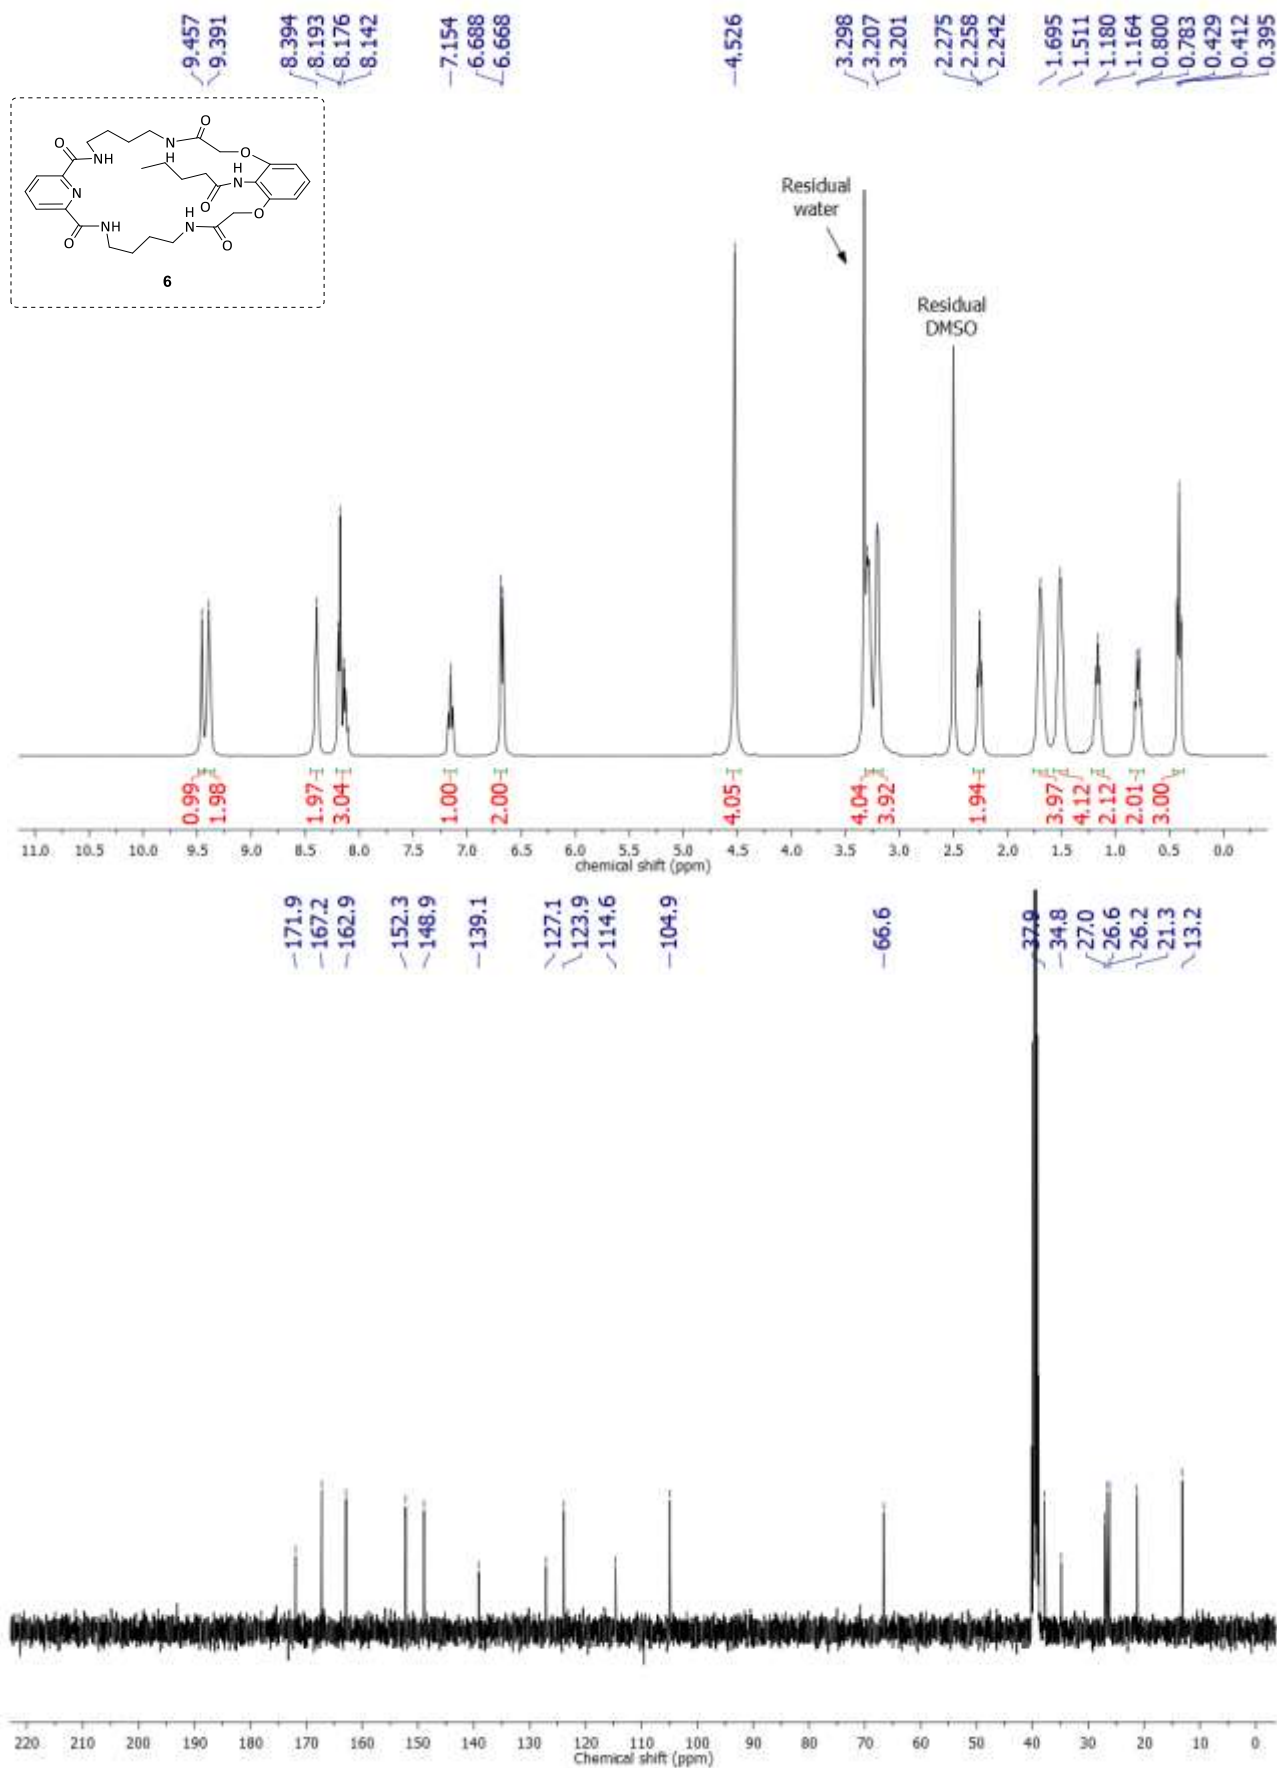

Figure S3. <sup>1</sup>H NMR (400 MHz) and <sup>13</sup>C NMR (100 MHz) spectra of compound **6** in DMSO-*d*<sub>6</sub>.

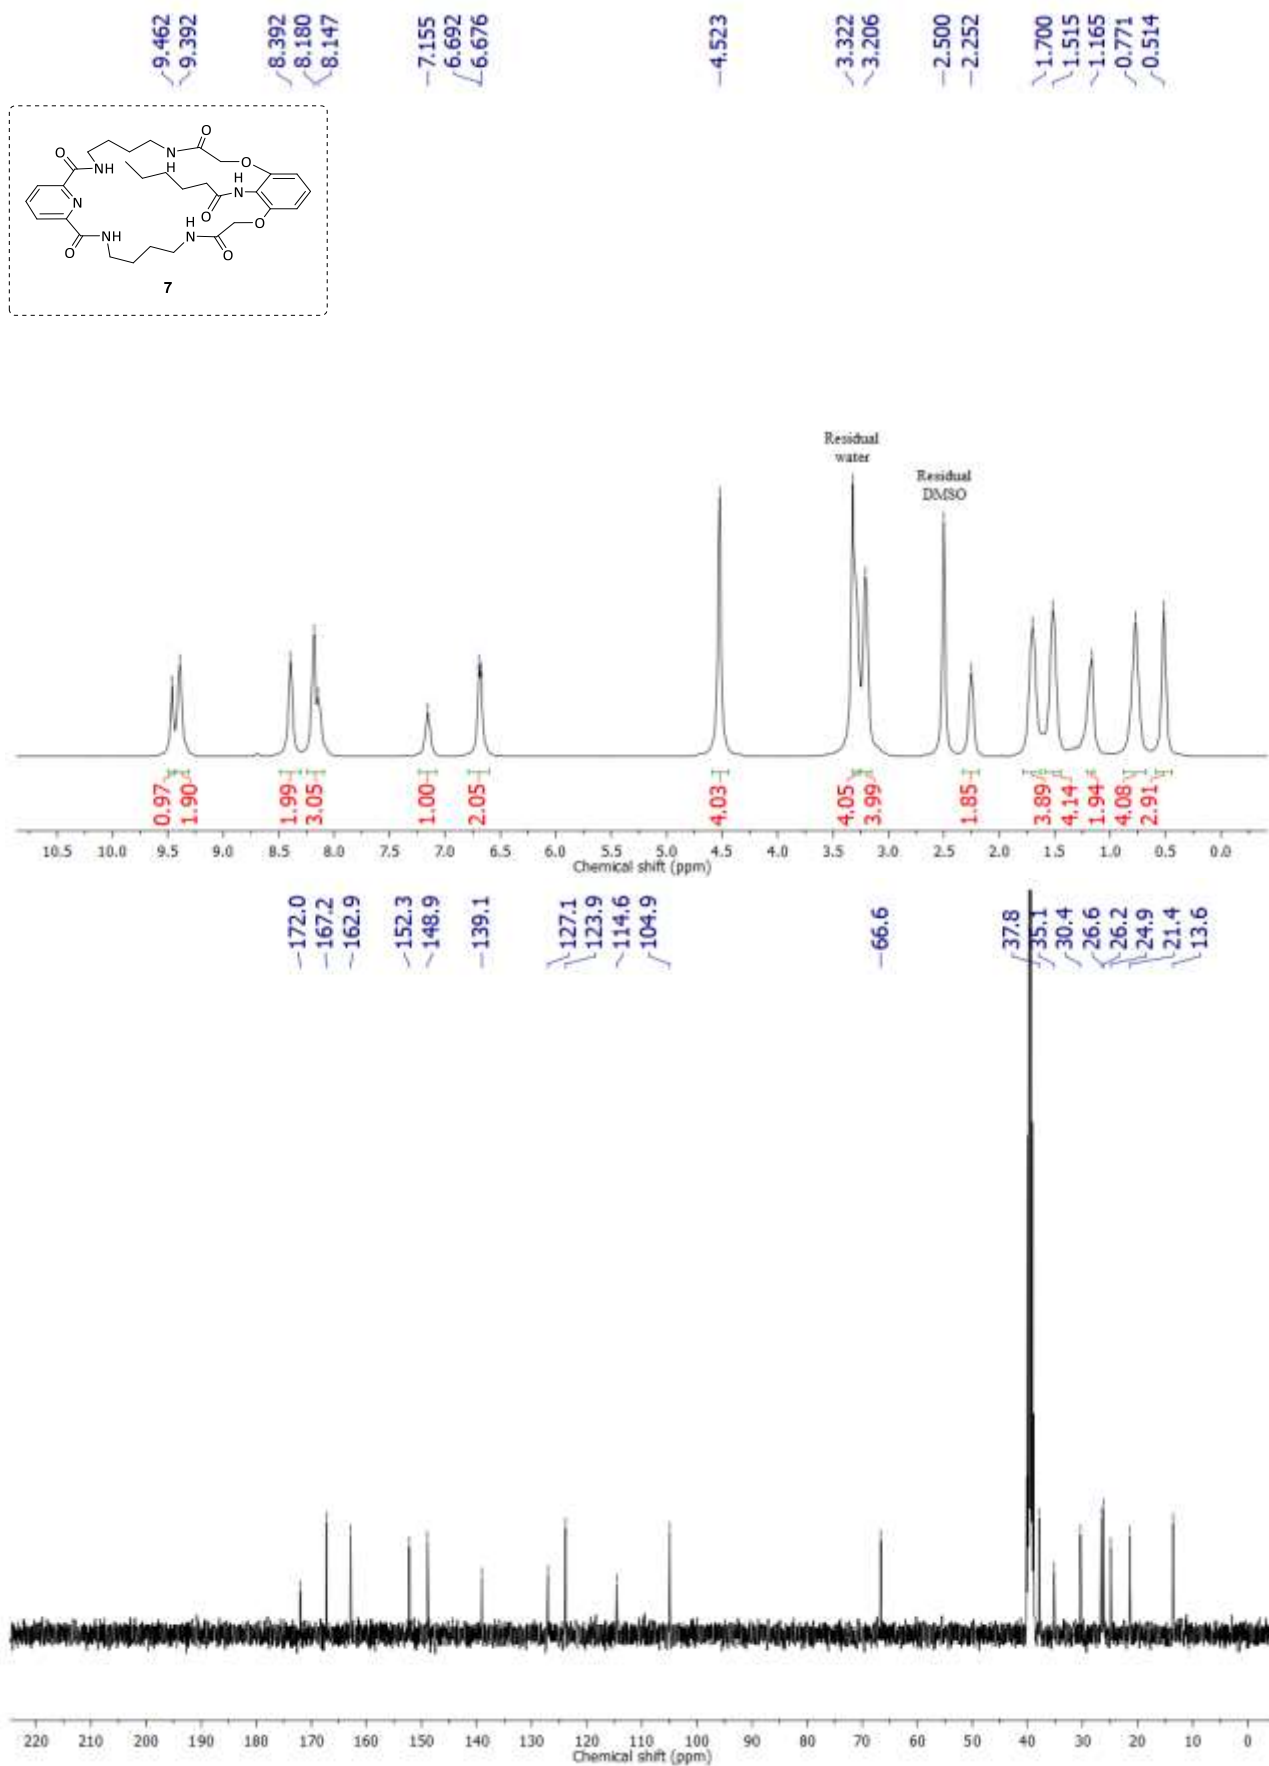

**Figure S4.** <sup>1</sup>H NMR (400 MHz) and <sup>13</sup>C NMR (100 MHz) spectra of compound **7** in DMSO-*d*<sub>6</sub>.

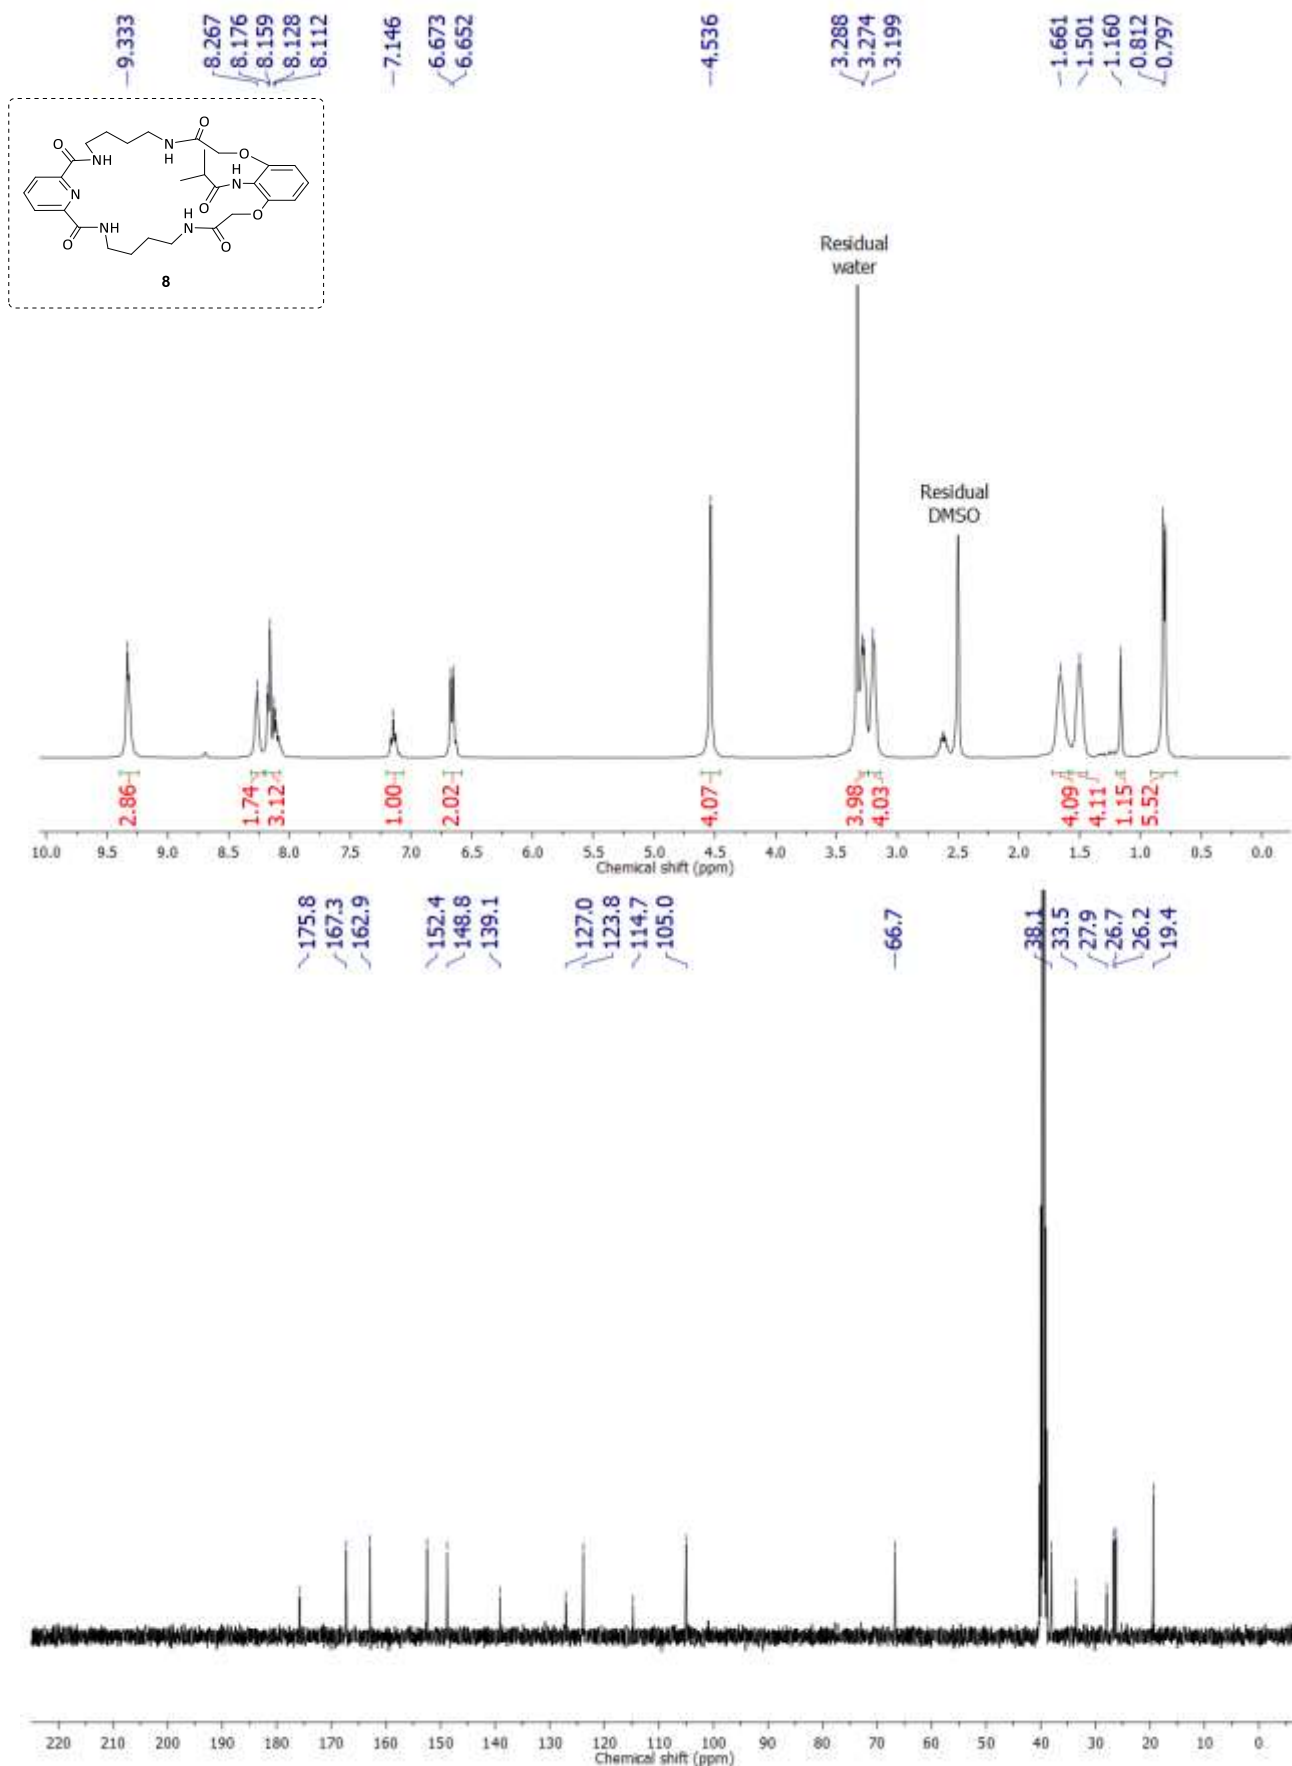

Figure S5. <sup>1</sup>H NMR (400 MHz) and <sup>13</sup>C NMR (100 MHz) spectra of compound **8** in DMSO-*d*<sub>6</sub>.

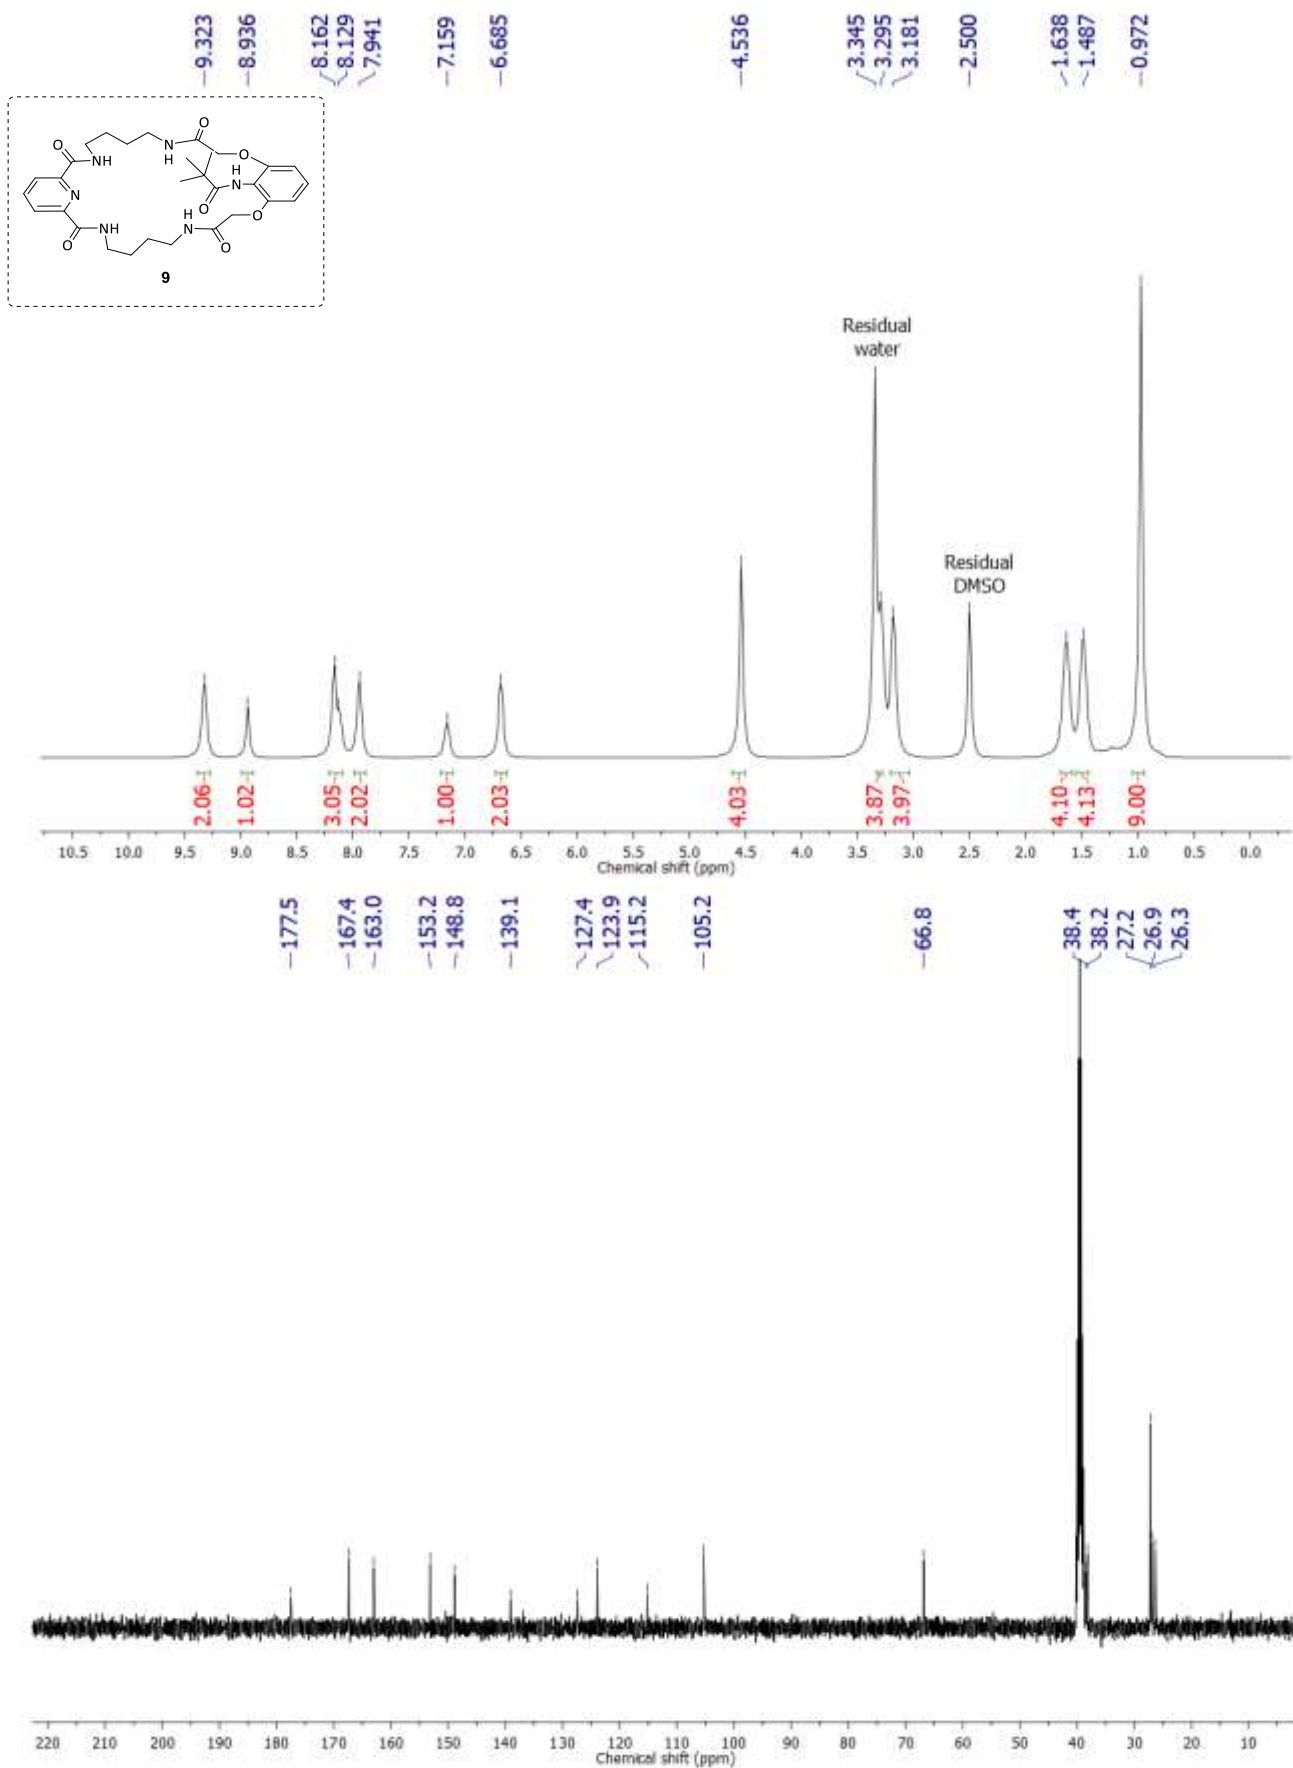

Figure S6. <sup>1</sup>H NMR (400 MHz) and <sup>13</sup>C NMR (100 MHz) spectra of compound 9 in DMSO-*d*<sub>6</sub>.

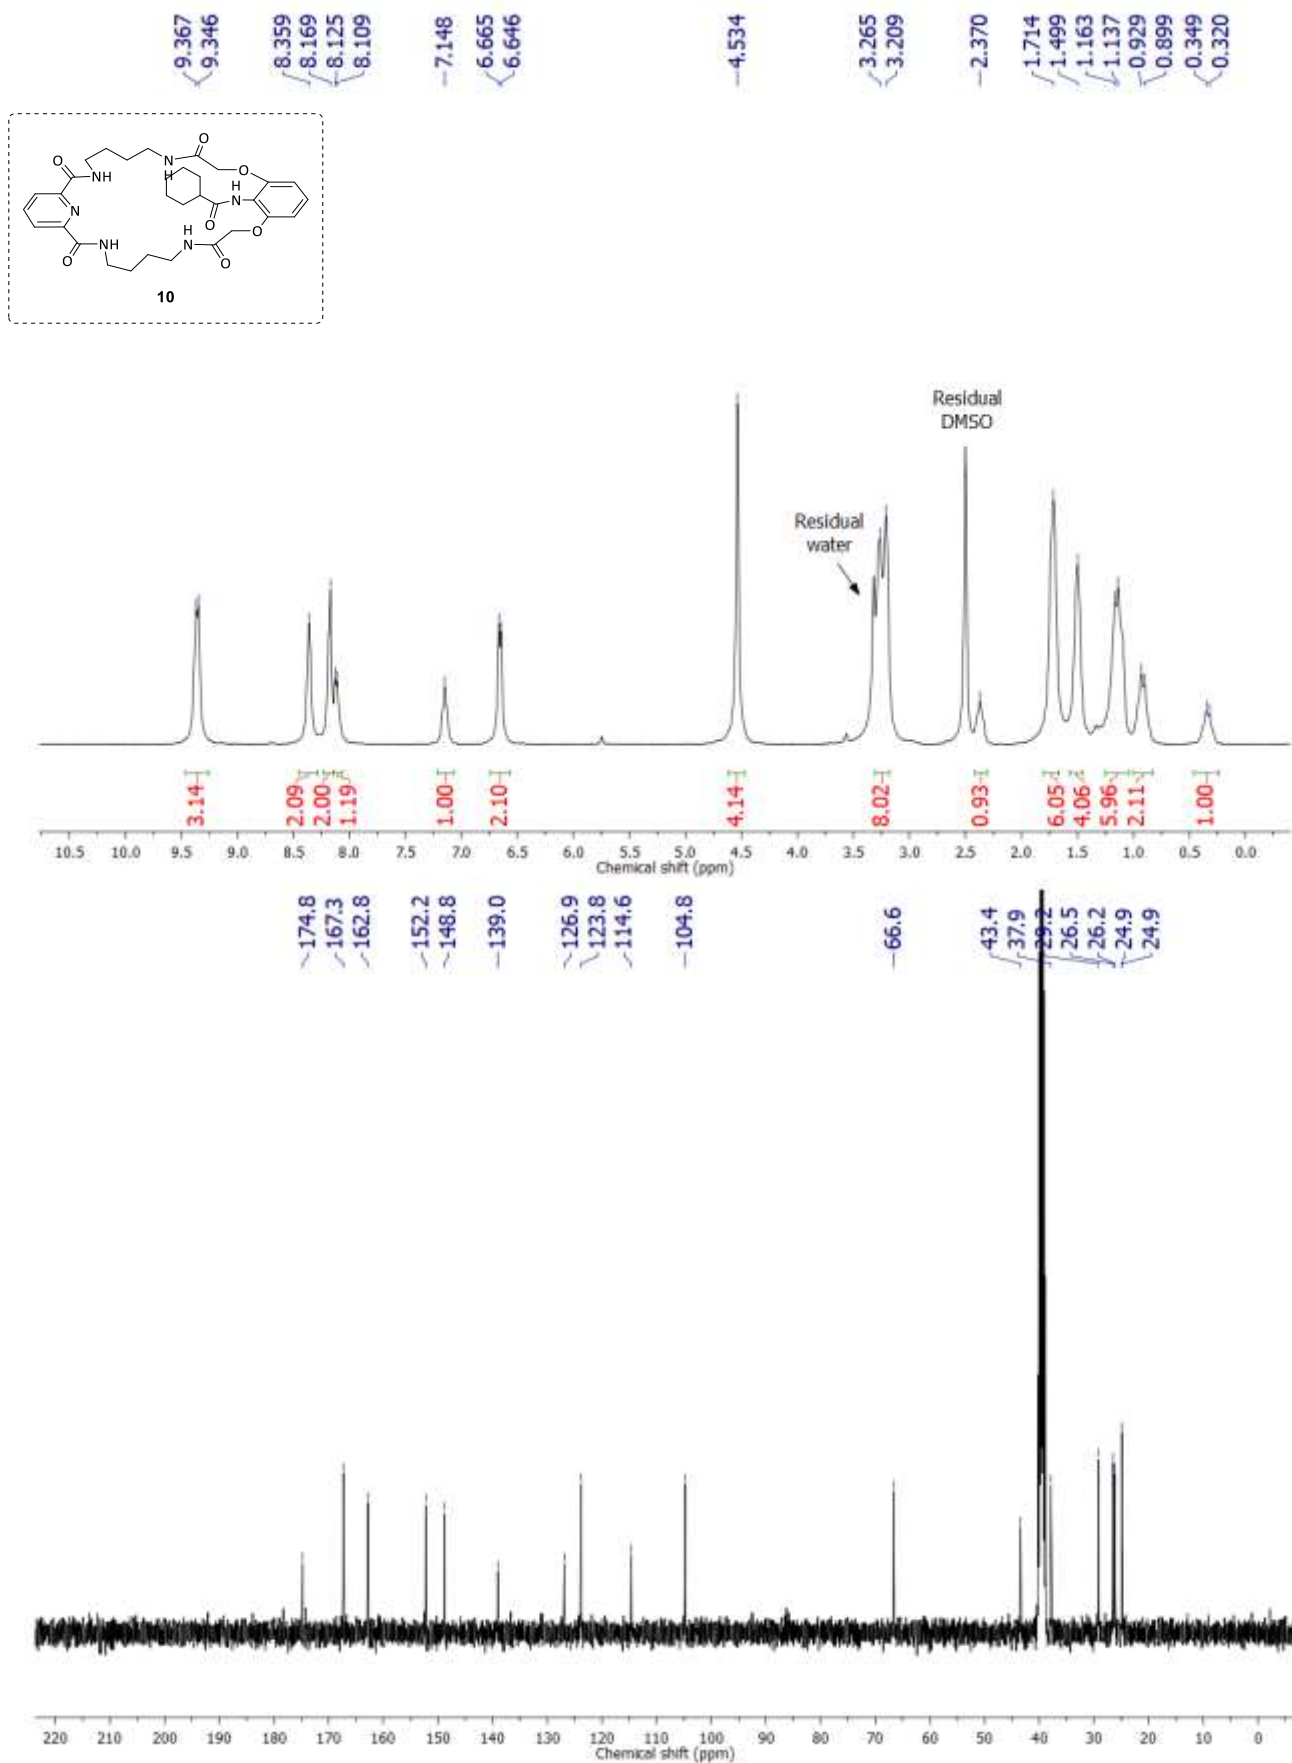

Figure S7. <sup>1</sup>H NMR (400 MHz) and <sup>13</sup>C NMR (100 MHz) spectra of compound **10** in DMSO-*d*<sub>6</sub>.

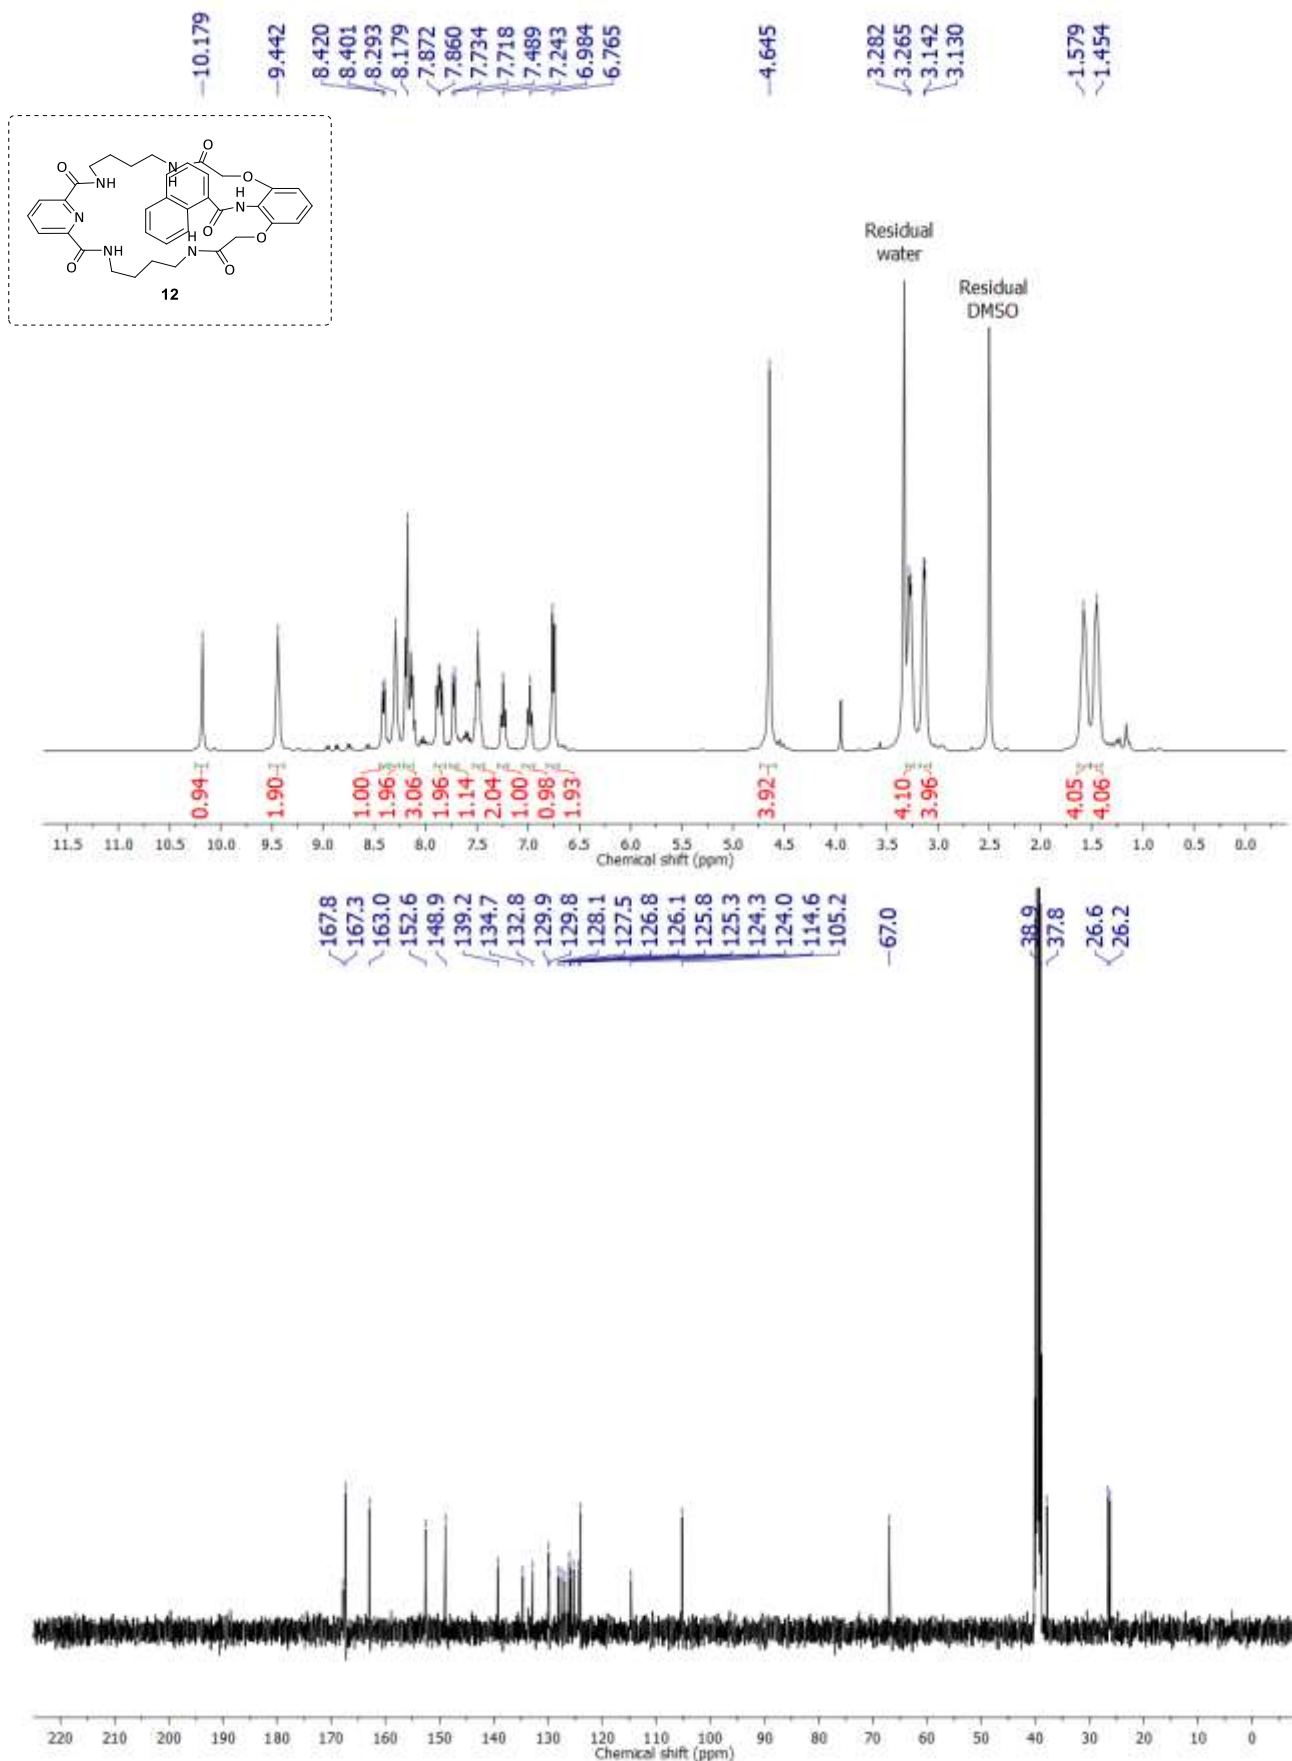

Figure S8. <sup>1</sup>H NMR (400 MHz) and <sup>13</sup>C NMR (100 MHz) spectra of compound **12** in DMSO-*d*<sub>6</sub>.

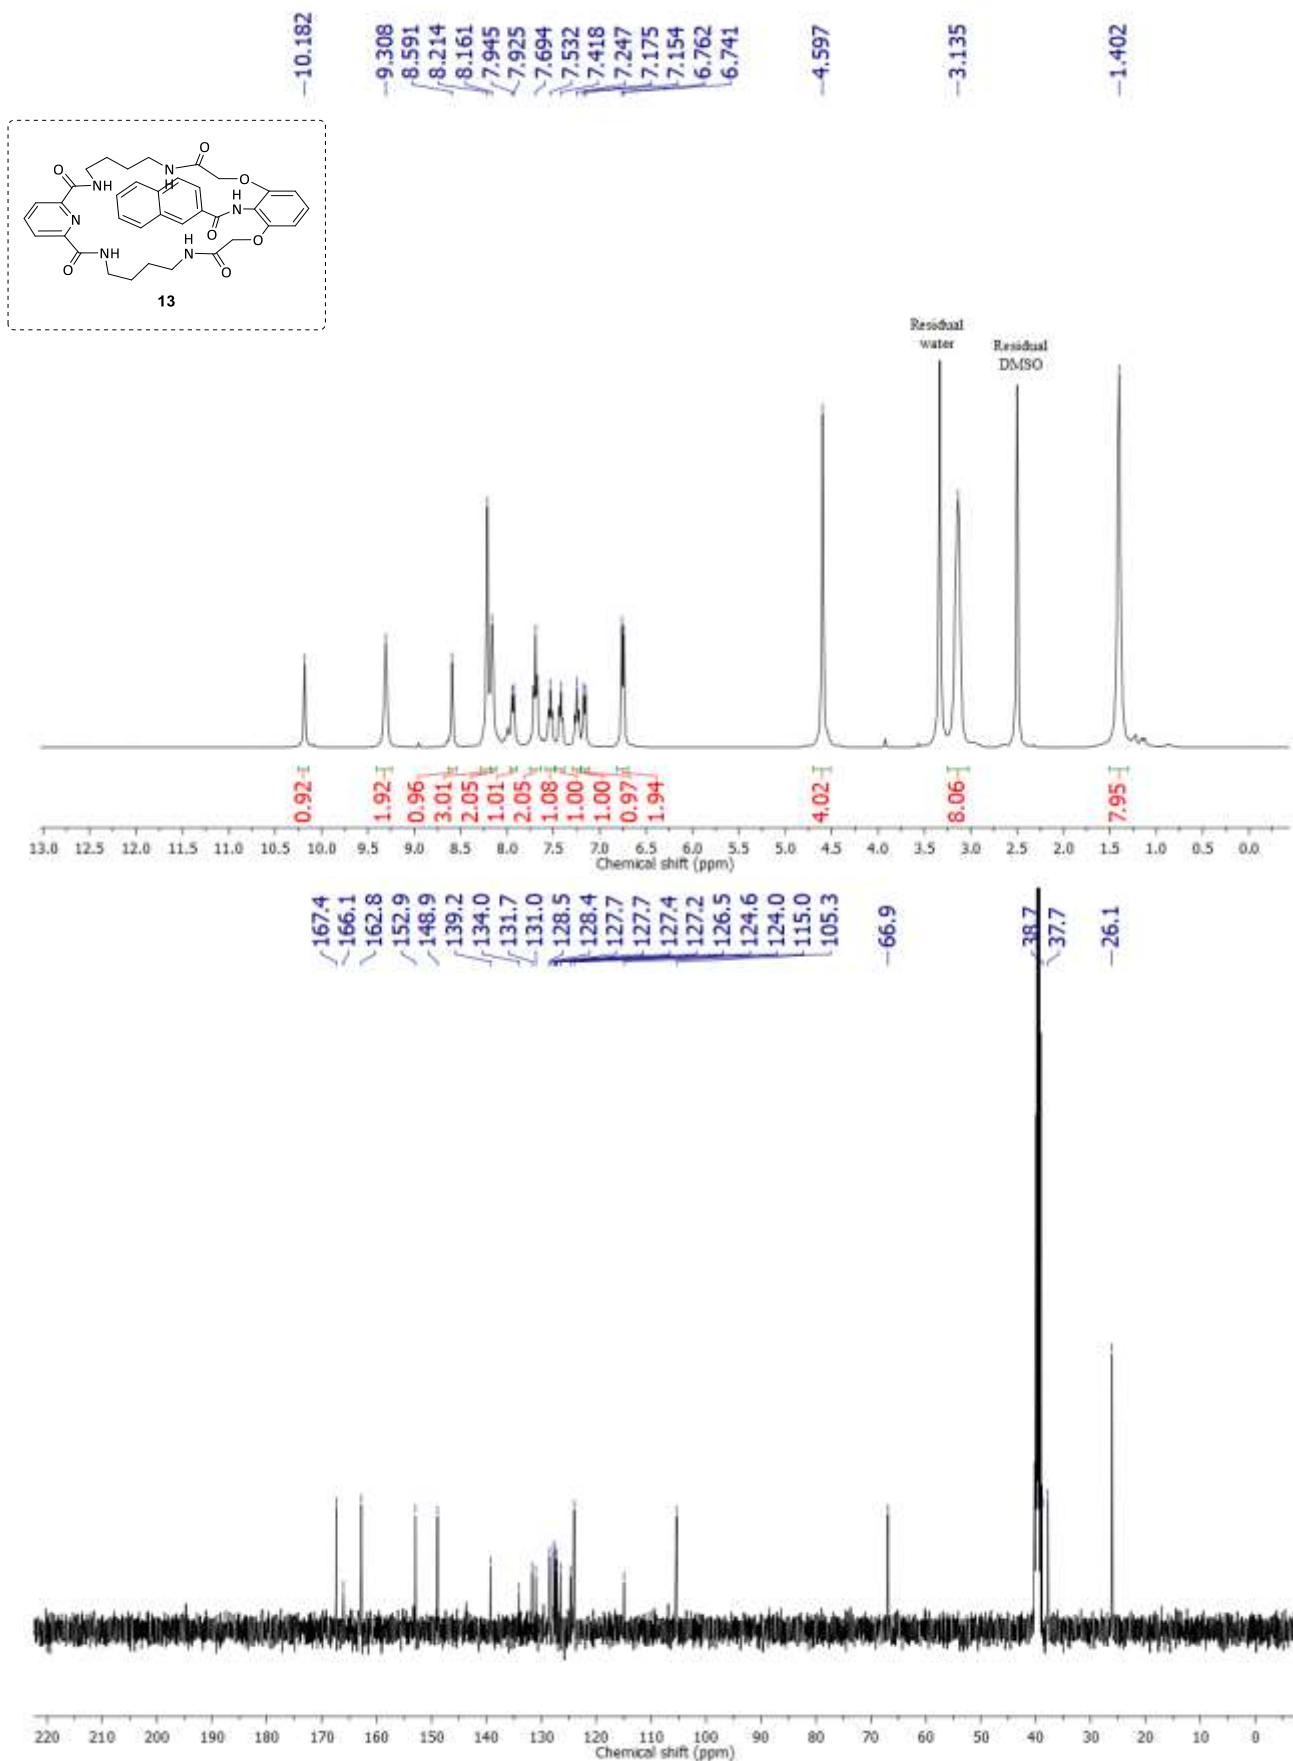

Figure S9. <sup>1</sup>H NMR (400 MHz) and <sup>13</sup>C NMR (100 MHz) spectra of compound **13** in DMSO-*d*<sub>6</sub>.



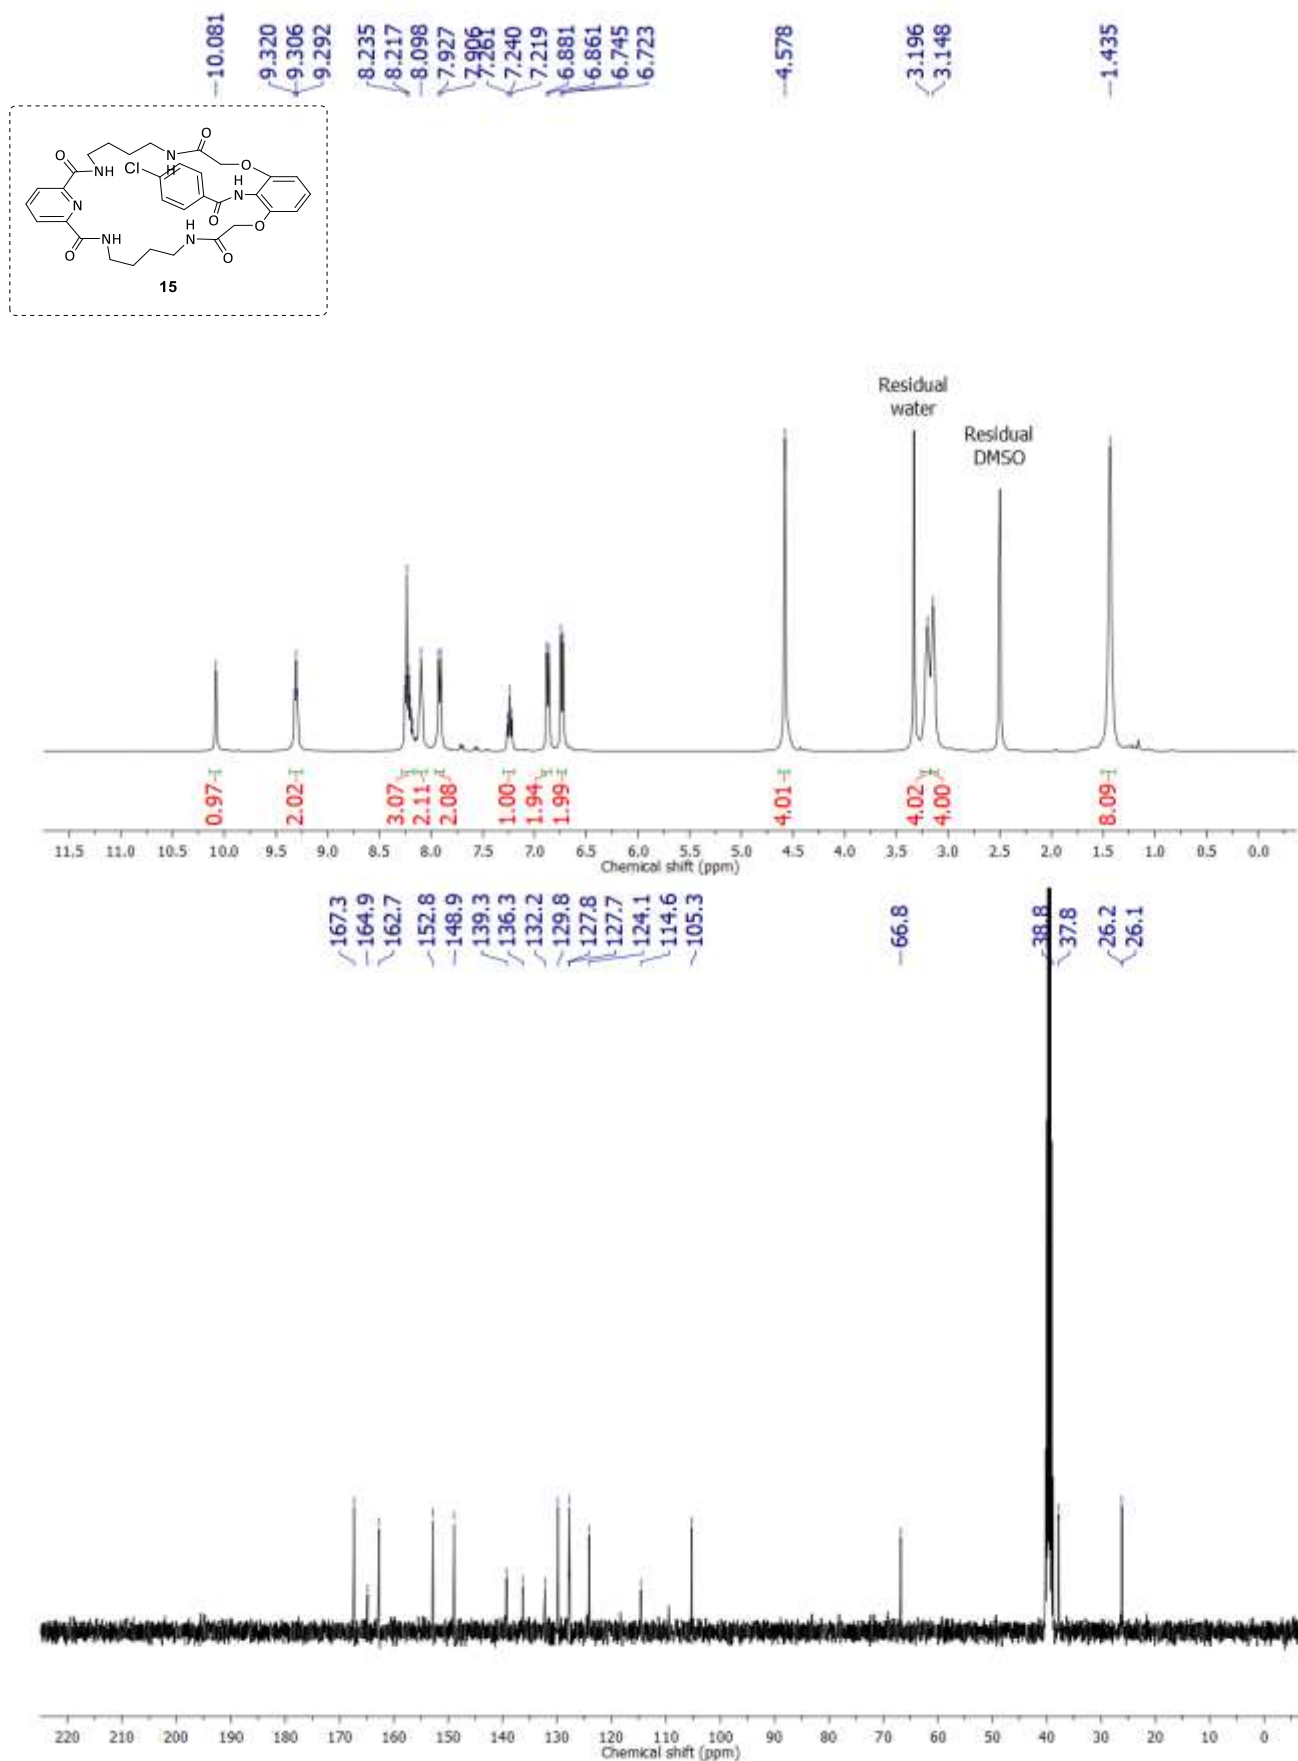

Figure S10. <sup>1</sup>H NMR (400 MHz) and <sup>13</sup>C NMR (100 MHz) spectra of compound **15** in DMSO-*d*<sub>6</sub>.

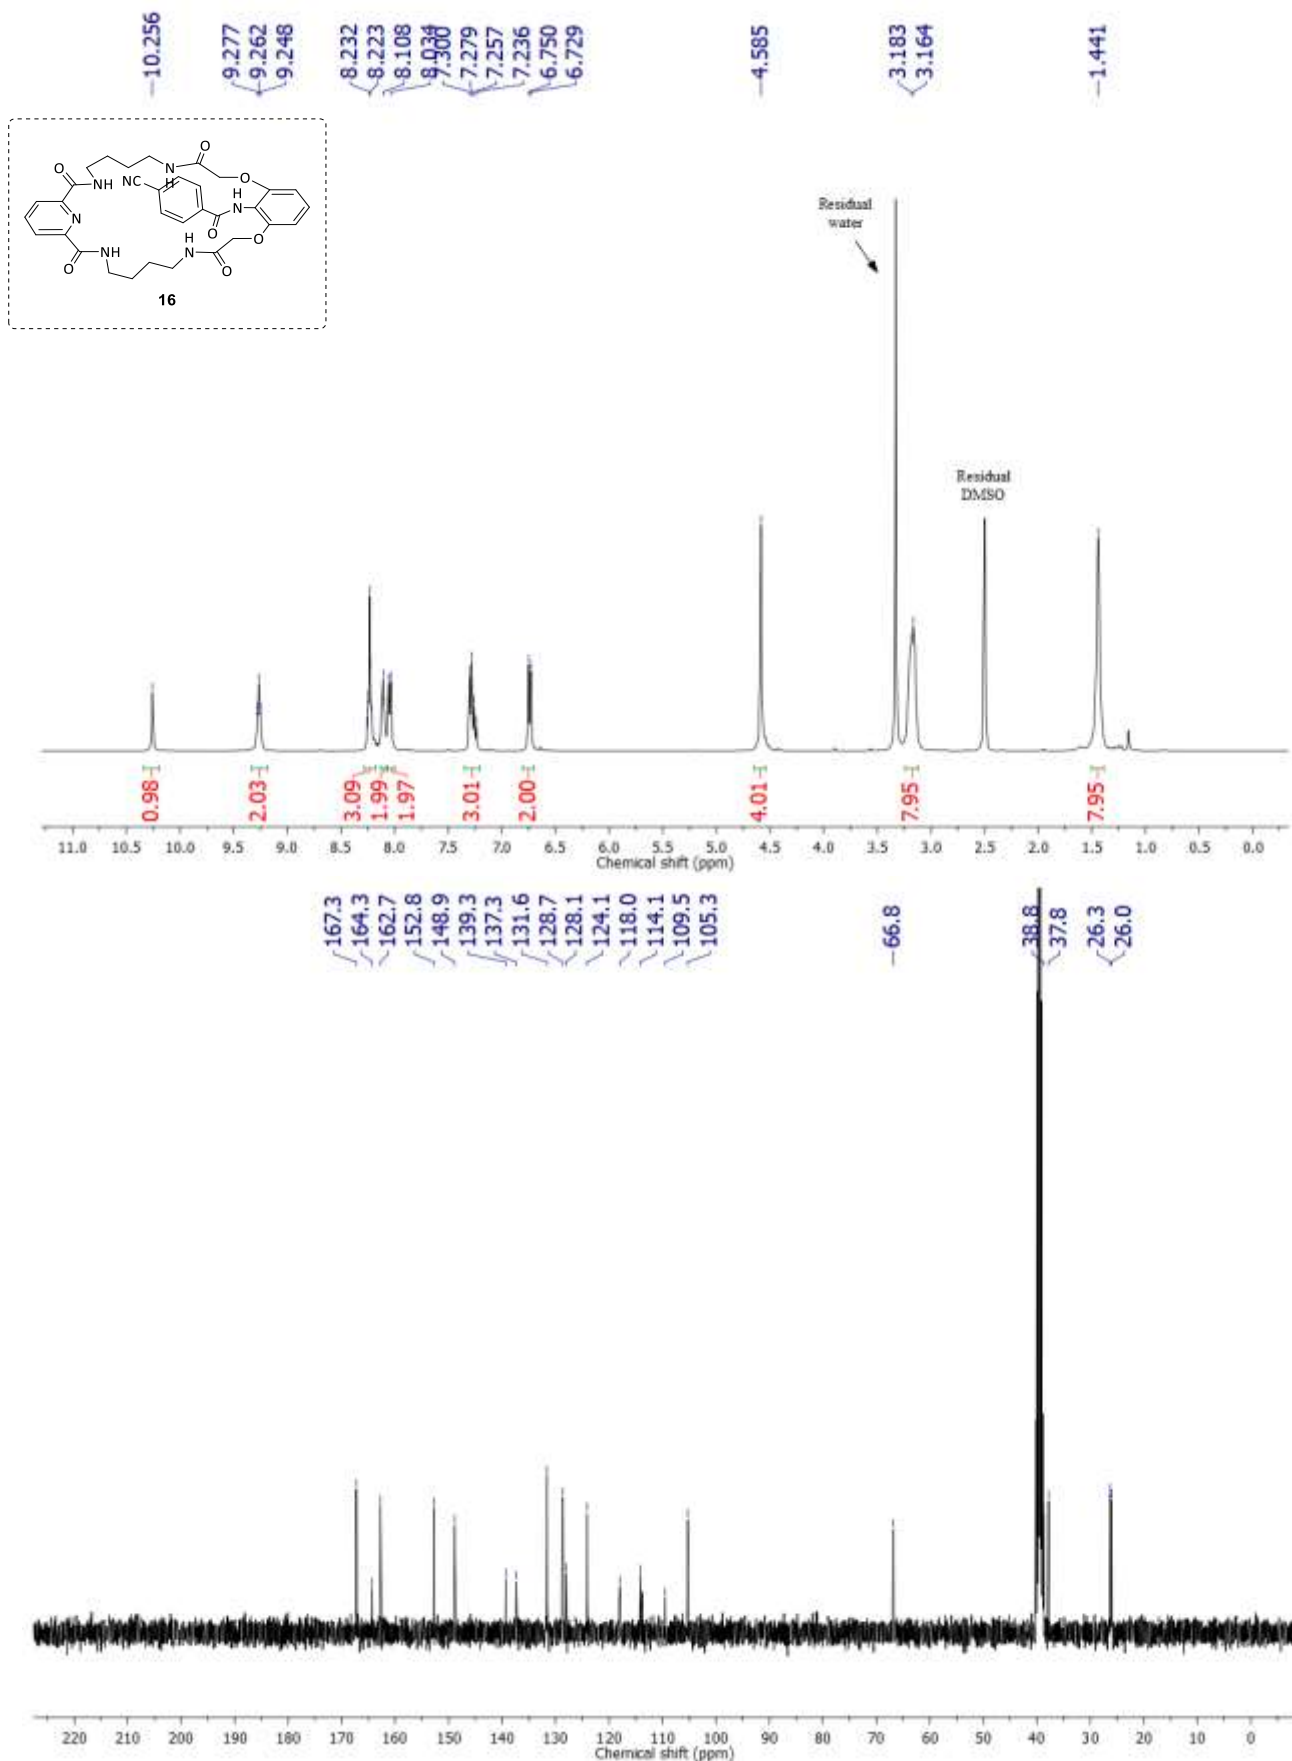

Figure S11. <sup>1</sup>H NMR (400 MHz) and <sup>13</sup>C NMR (100 MHz) spectra of compound 16 in DMSO-*d*<sub>6</sub>.

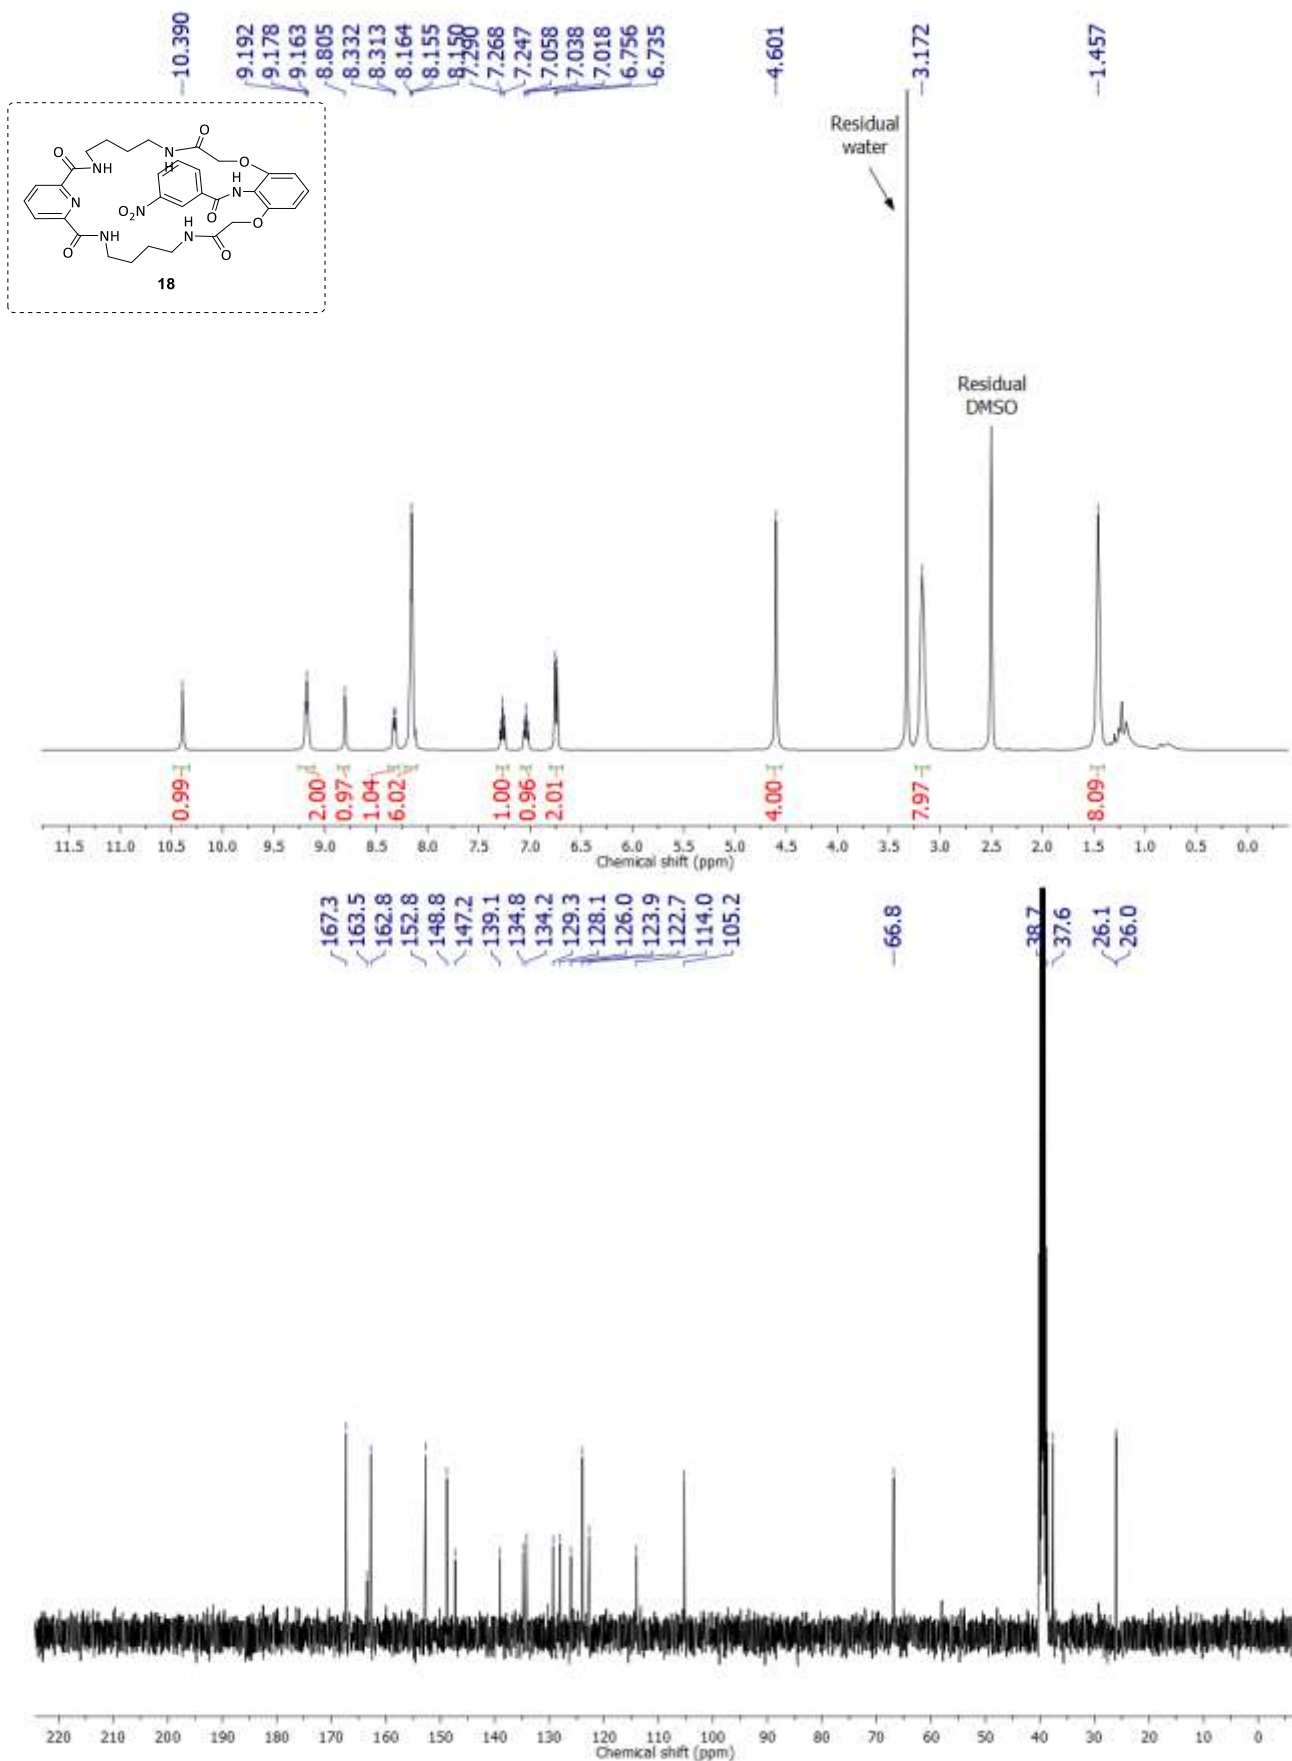

**Figure S12.** <sup>1</sup>H NMR (400 MHz) and <sup>13</sup>C NMR (100 MHz) spectra of compound **18** in DMSO-*d*<sub>6</sub>.

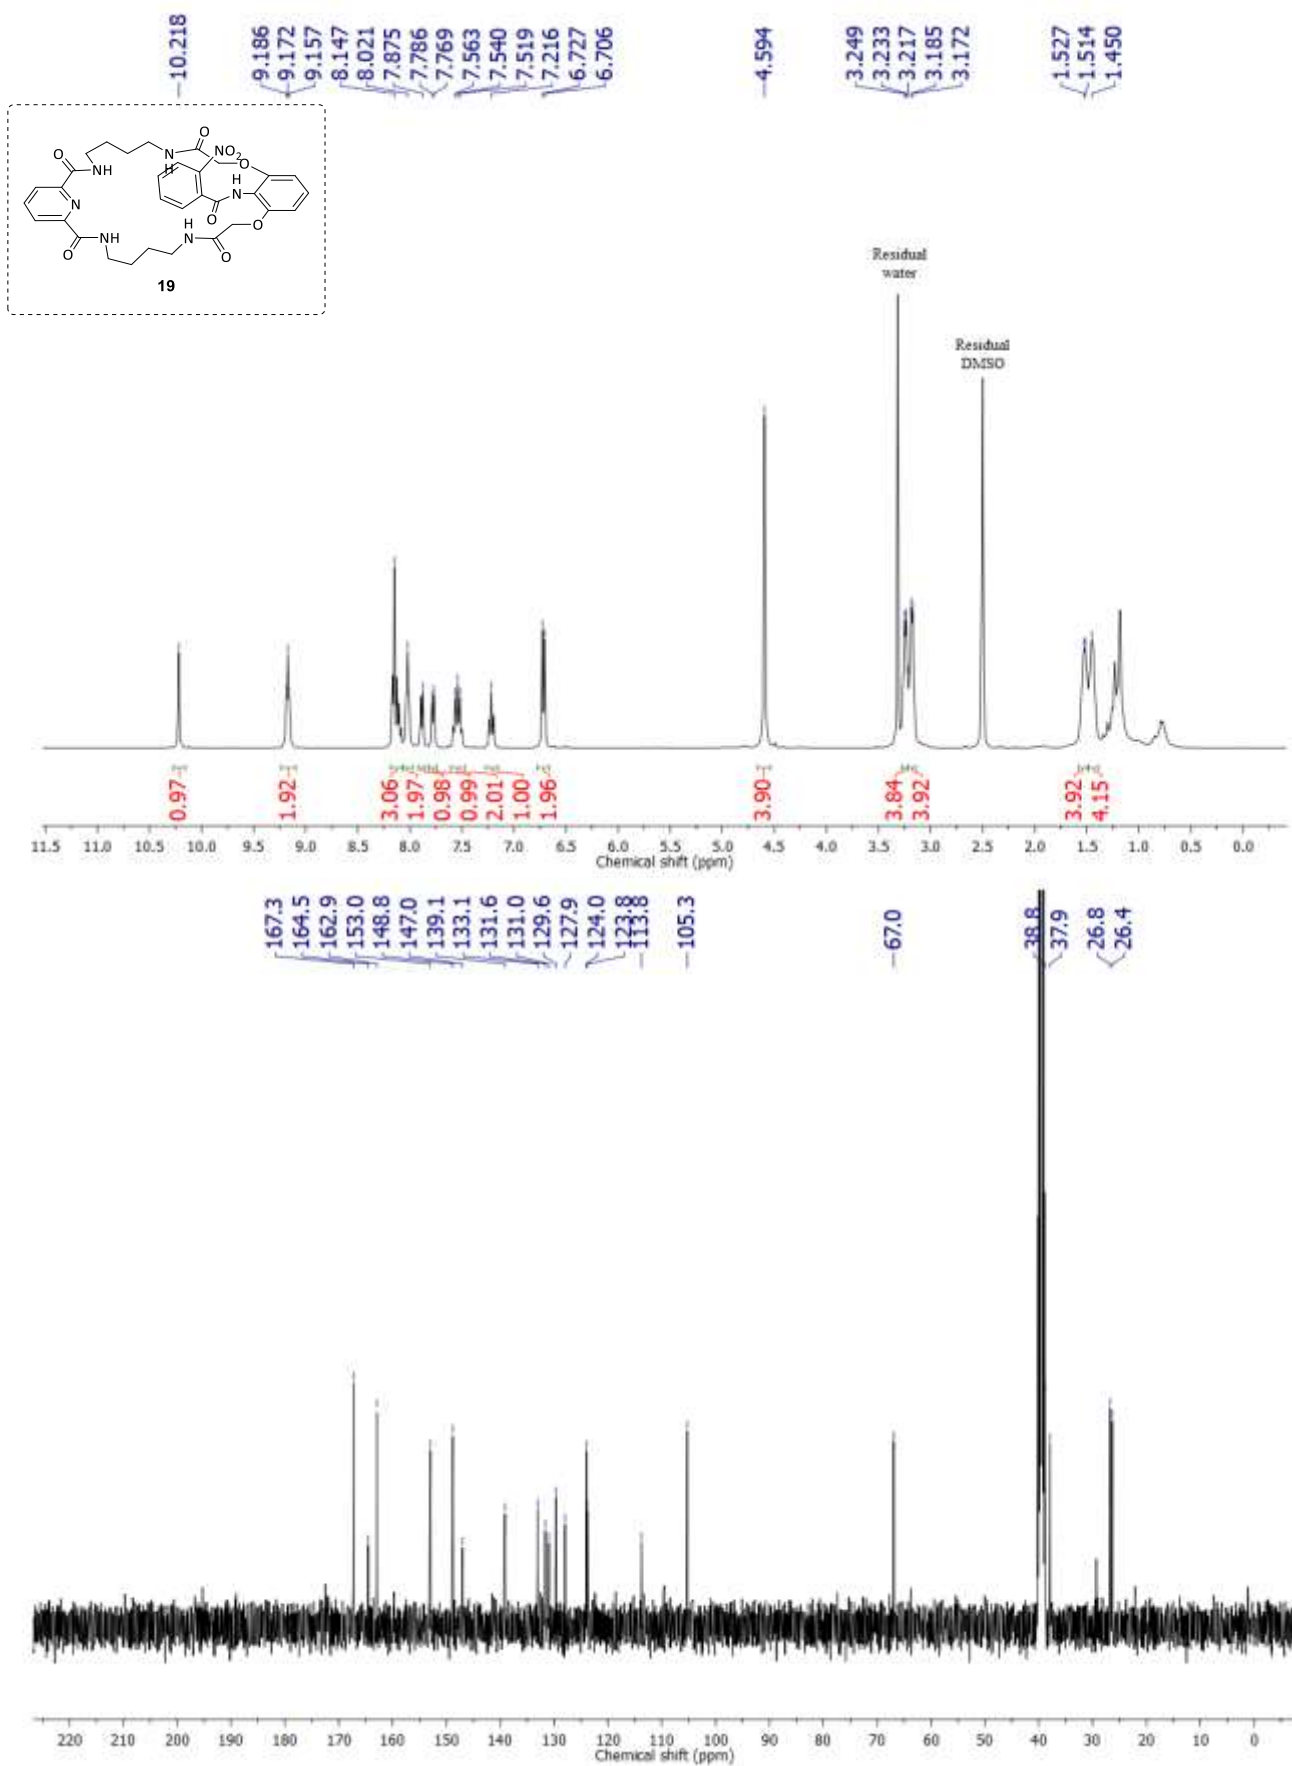

Figure S13. <sup>1</sup>H NMR (400 MHz) and <sup>13</sup>C NMR (100 MHz) spectra of compound 19 in DMSO-*d*<sub>6</sub>.

### 3. Titration experiments

As the source of anion, commercially available tetrabutylammonium salt was used. HPLC grade water was added to the commercially available DMSO- $d_6$  of 99.9% isotopic purity to obtain the appropriate water concentration. The host solution was titrated in a NMR tube with the solution of the TBA salt in receptor aliquots (details are given in Table S1). The binding constants were calculated from the changes in chemical shifts of ligand protons which were shifted during titration. Nonlinear curve fitting was carried out with HypNMR 2008<sup>2</sup> (Version 4.0.71) program with fitting to the appropriate global binding model (see Table S1).

**Table. S2.** Titration details, global stability constants  $K_a$  ( $M^{-1}$ ), and selected maximum signal shifts ( $\Delta\delta_{\max}$ ) of amide protons for Receptors **3**, **5**, **6**, **10**, **11**, **14**, and **17** with  $H_2PO_4^-$  in DMSO- $d_6$  + 0.5%  $H_2O$ <sup>a</sup>

| Entry | Receptor  | $C_{\text{Host}}$ [M] | $C_{\text{Guest}}$ [M] | $K_a$ [ $M^{-1}$ ]<br>(H:G) | $\Delta\delta_{\max}$ [ppm] |      |       |       |
|-------|-----------|-----------------------|------------------------|-----------------------------|-----------------------------|------|-------|-------|
|       |           |                       |                        |                             | NH♦                         | NH●  | CH▲   | CH■   |
| 1     | <b>3</b>  | 0.01558               | 0.09008                | 8600 (1:1)<br>210 (1:2)     | 1.42                        | 0.18 | -0.06 | -0.04 |
| 2     | <b>5</b>  | 0.01440               | 0.08960                | 40 (1:1)<br>100 (2:1)       | 1.05                        | 0.10 | -0.08 | -0.07 |
| 3     | <b>6</b>  | 0.01494               | 0.08859                | 1520 (1:1)<br>6 (1:2)       | 1.52                        | 0.06 | -0.05 | -0.02 |
| 4     | <b>10</b> | 0.01401               | 0.08802                | 1620 (1:1)<br>20 (1:2)      | 1.75                        | 0.10 | -0.04 | -0.01 |
| 5     | <b>11</b> | 0.01518               | 0.06653                | 1700 (1:1)<br>290 (2:1)     | 1.47                        | 0.31 | -0.07 | -0.01 |
| 6     | <b>14</b> | 0.01439               | 0.08763                | 1020 (1:1)<br>210 (2:1)     | 1.75                        | 0.27 | -0.01 | -     |
| 7     | <b>17</b> | 0.01033               | 0.05327                | 3770 (1:1)<br>40 (1:2)      | 1.72                        | 0.27 | -0.10 | -0.08 |

<sup>a</sup> Values determined by <sup>1</sup>H NMR titration experiments at  $T = 298$  K using HypNMR 2008 software,<sup>2</sup> errors < 10%, TBA salt as the source of anion.

**Figure S14.** Labeling of the selected proton peaks of the receptors **3**, **5**, **6**, **10**, **11**, **14**, and **17**

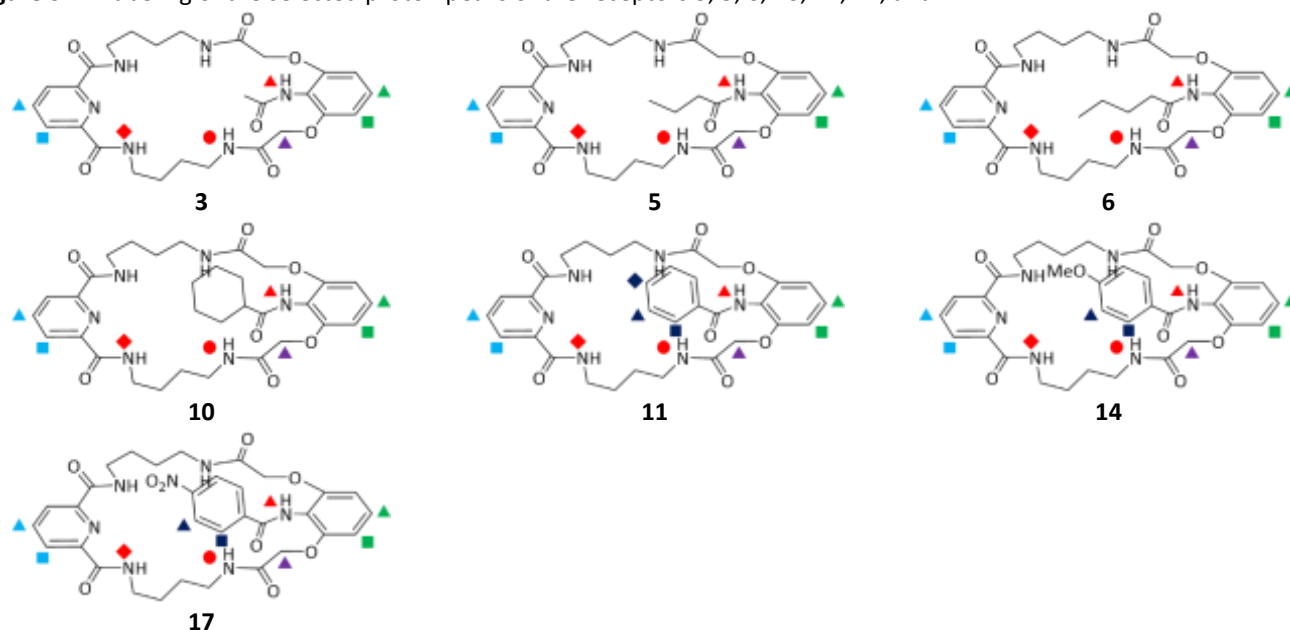

3

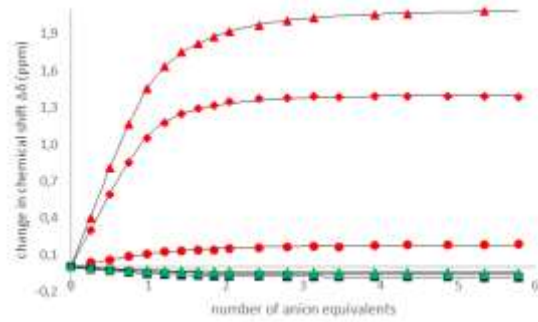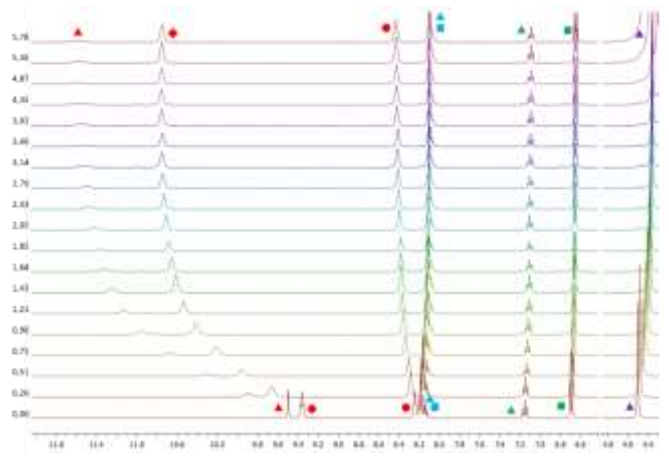

5

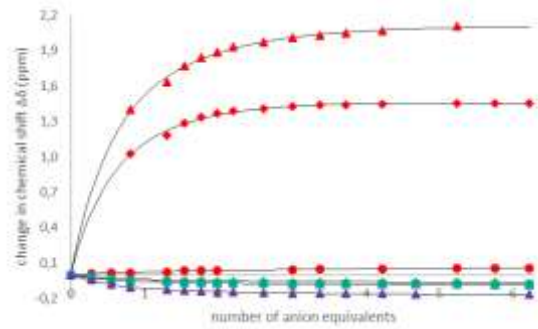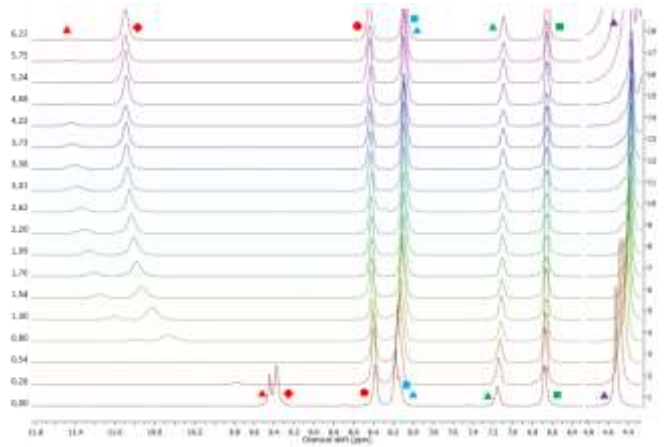

6

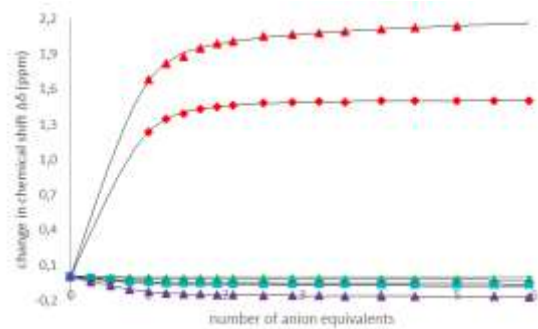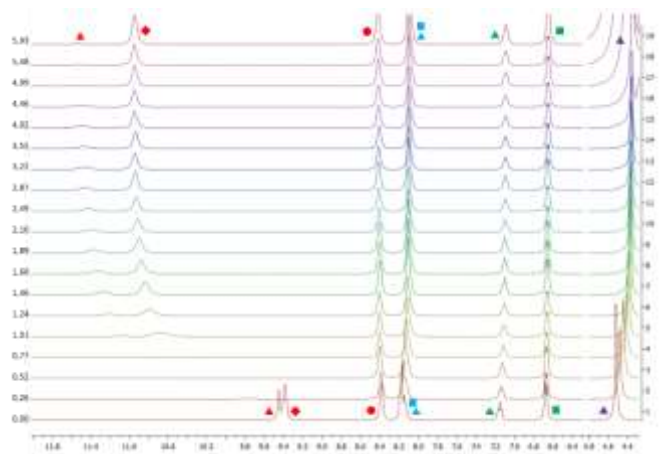

10

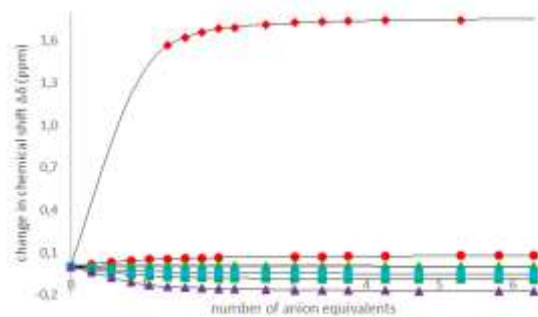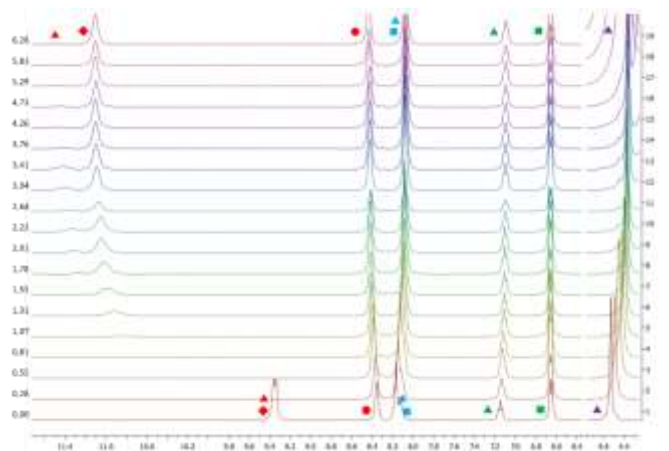

11

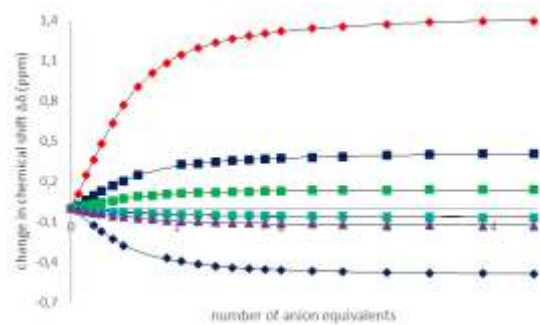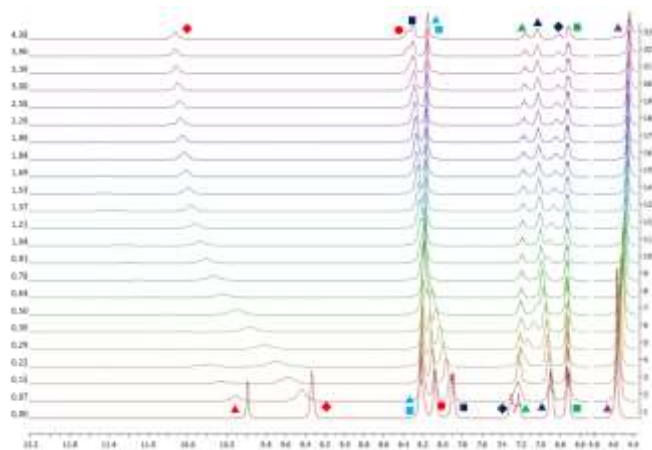

14

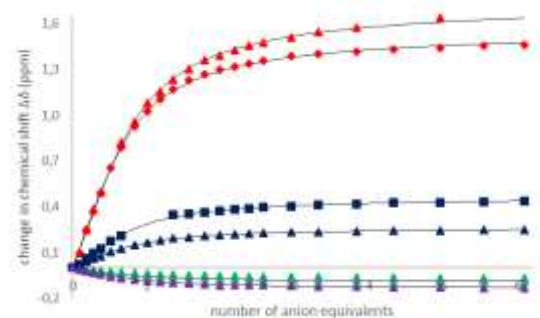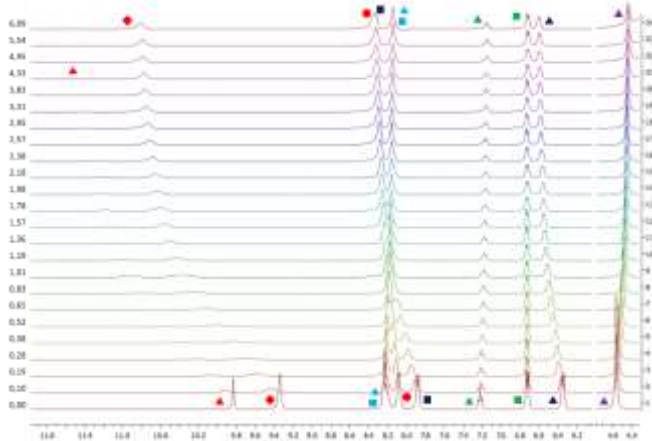

17

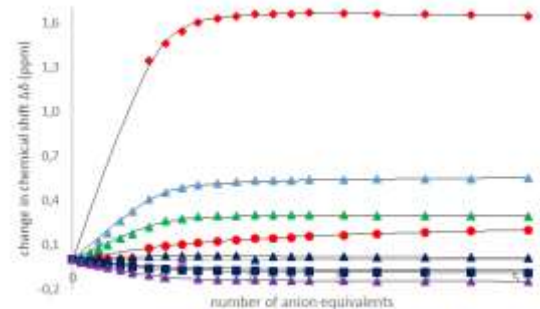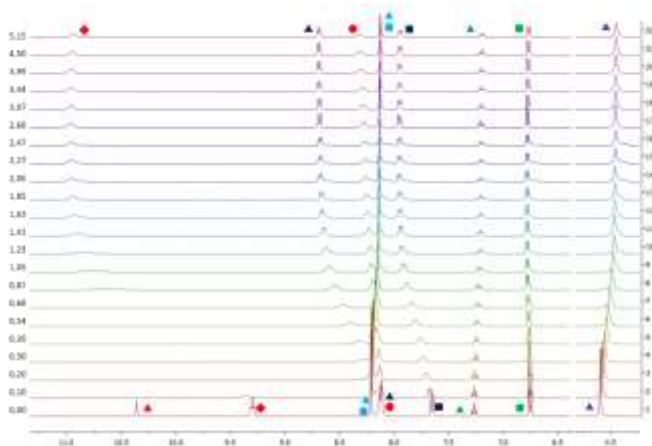

**Figure S15.** Corresponding experimental chemical shift changes (symbols) and calculated binding isotherms (lines) (left); Stacked plots from  $^1\text{H}$  NMR titrations of Receptors **3**, **5**, **6**, **10**, **11**, **14**, and **17** with increasing amount of  $n\text{-Bu}_4\text{NH}_2\text{PO}_4$  in  $\text{DMSO-}d_6 + 0.5\%$   $\text{H}_2\text{O}$  (v/v) (right).

| Experiment         |                                      |
|--------------------|--------------------------------------|
| Name               | Value                                |
| Author(s)          | P Niedbała, J. Jurczak               |
| Experiment name    | Host-NHCOMe + TBAH2PO4 (DCM, UV-Vis) |
| Experiment date    | Thursday, August 20, 2020 12:00 AM   |
| Fit date           | Friday, August 21, 2020 12:28 PM     |
| Lab book reference |                                      |
| Host species       | Host-NHCOMe                          |
| Guest species      | TBAH2PO4                             |
| Solvent            | DCM                                  |
| Temperature        | 25 C                                 |

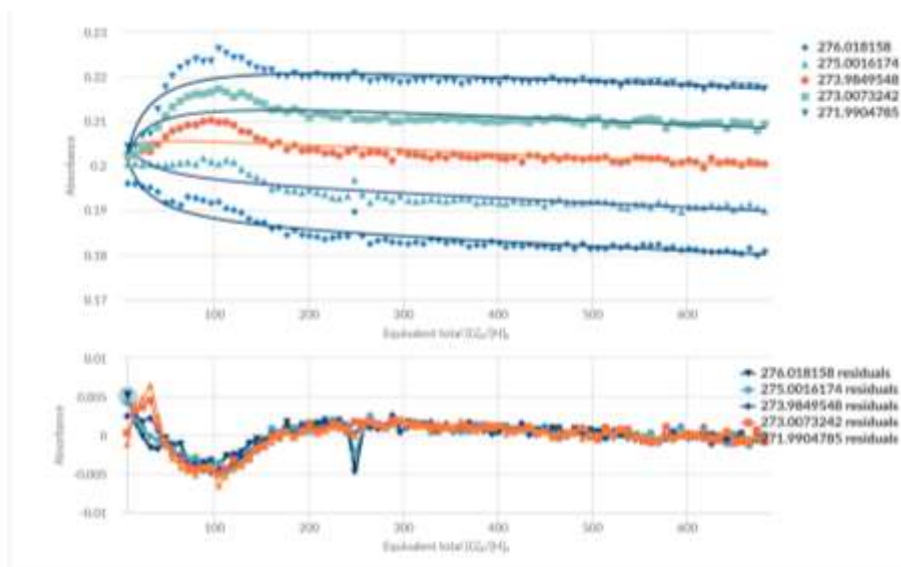

**Figure S16.** Calculated binding isotherms of UV-Vis titration of Receptor **3** with increasing amount of *n*-Bu<sub>4</sub>NH<sub>2</sub>PO<sub>4</sub> in DCM.

## 4. References

- [1] Dabrowa, K.; Niedbała, P.; Majdecki, M.; Duszewski, P.; Jurczak, J. A General Method for Synthesis of Unclosed Cryptands via H-Bond Templated Macrocyclization and Subsequent Mild Postfunctionalization. *Org. Lett.* **2015**, *17*, 4774-4777.
- [2] Rodríguez-Barrientos, D.; Rojas-Hernández, A.; Gutiérrez, A.; Moya-Hernández, R.; Gómez-Balderas, R.; Ramírez-Silva, M. T. Determination of pKa values of tenoxicam from <sup>1</sup>H NMR chemical shifts and of oxicams from electrophoretic mobilities (CZE) with the aid of programs SQUAD and HYPNMR. *Talanta* **2009**, *80*, 754-762.
